# Supplementary material
Source: PubMed Central journal article supplement (PMC2733940)

## Supplemental Table 1

### A From 130kD

| Sample  | Antibody | Age | Raw tags  | BLAT (mm8) | % align     | Unique tags |
|---------|----------|-----|-----------|------------|-------------|-------------|
| Brain A | 2A8      | P13 | 5,057,657 | 4,168,244  | <b>82.4</b> | 237,824     |
| Brain B | 2A8      | P13 | 4,291,392 | 3,504,911  | <b>81.7</b> | 359,405     |
| Brain C | 2A8      | P13 | 3,843,297 | 3,073,034  | <b>80</b>   | 328,916     |
| Brain D | 7G1-1    | P13 | 6,259,297 | 5,118,928  | <b>81.8</b> | 420,627     |
| Brain E | 7G1-1    | P13 | 6,394,071 | 5,188,918  | <b>81.2</b> | 423,024     |

### B From 110kD

| Sample  | Antibody | Age | Raw tags  | BLAST (miRBASE) | % align     |
|---------|----------|-----|-----------|-----------------|-------------|
| Brain A | 2A8      | P13 | 4,918,586 | 3,717,702       | <b>75.6</b> |
| Brain B | 2A8      | P13 | 4,160,480 | 3,004,104       | <b>72.2</b> |
| Brain C | 2A8      | P13 | 3,490,474 | 2,576,516       | <b>73.8</b> |
| Brain D | 7G1-1    | P13 | 4,853,688 | 4,275,690       | <b>88.1</b> |
| Brain E | 7G1-1    | P13 | 5,409,367 | 4,765,957       | <b>88.1</b> |

Supplemental Table 2

A

| AGO-mRNA CLIP     |                        |                |                       | AGO-miRNA CLIP |                   |                                   |      |
|-------------------|------------------------|----------------|-----------------------|----------------|-------------------|-----------------------------------|------|
| Top ranking motif | Regression coefficient | Number of tags | P-value               | miRNA          | Position of motif | Percentage in Ago-miRNA CLIP tags | Rank |
| TGCCTT            | 0.521                  | 9153           | $8.3 \times 10^{-58}$ | mir-124        | 2-7               | 2.97%                             | 8    |
| TACCTC            | 0.512                  | 6403           | $1.6 \times 10^{-40}$ | let-7          | 2-7               | 6.24%                             | 5    |
| CCAAAG            | 0.393                  | 6878           | $3.1 \times 10^{-32}$ | mir-9          | 2-7               | 9.33%                             | 2    |
| CTGTGA            | 0.388                  | 4205           | $5.0 \times 10^{-23}$ | mir-27         | 2-7               | 4.80%                             | 6    |
| TGTTTA            | 0.436                  | 3206           | $7.9 \times 10^{-21}$ | mir-30         | 3-8               | 34.01%                            | 1    |
| CTTGAA            | 0.356                  | 2977           | $1.5 \times 10^{-14}$ | mir-26         | 1-6               | 6.39%                             | 4    |

B

| AGO-miRNA CLIP |                 |         |                                       |       | AGO-mRNA CLIP     |                                     |                              |
|----------------|-----------------|---------|---------------------------------------|-------|-------------------|-------------------------------------|------------------------------|
| Rank           | 7mer seed motif | miRNA   | Number of Ago-miRNA CLIP tags (Total) | %     | 7mer seed obs/exp | Number of mRNA tags with seed (obs) | Number of clusters with seed |
| 1              | TGTTTAC         | miR-30  | 8,417,151                             | 34.29 | 3.304             | 1521                                | 172                          |
| 2              | ACCAAAG         | miR-9   | 2,309,955                             | 9.41  | 2.175             | 1676                                | 211                          |
| 3              | TGAATGT         | miR-181 | 2,050,154                             | 8.35  | 1.549             | 862                                 | 132                          |
| 4              | TACTTGA         | miR-26  | 1,581,514                             | 6.44  | 2.436             | 687                                 | 68                           |
| 5              | CTACCTC         | let-7   | 1,549,064                             | 6.31  | 4.000             | 2636                                | 268                          |
| 6              | ACTGTGA         | miR-27  | 1,188,538                             | 4.84  | 1.190             | 969                                 | 137                          |
| 7              | AGCTCCT         | miR-708 | 1,172,287                             | 4.78  | 0.202             | 83                                  | 12                           |
| 8              | GTGCCTT         | miR-124 | 735,430                               | 3.00  | 5.187             | 3362                                | 294                          |
| 9              | CACTGCC         | miR-34  | 333,089                               | 1.36  | 0.312             | 147                                 | 30                           |
| 10             | CTCAGGG         | miR-125 | 330,186                               | 1.35  | 1.187             | 506                                 | 65                           |

# Supplemental Table 3

| Rank | Frequency in Ago miRNA CLIP | miRNA family | Seed motif     | All seeds |           |                                     |                    | Conserved seeds |           |                                     |                    | miRNAs                                                                           |
|------|-----------------------------|--------------|----------------|-----------|-----------|-------------------------------------|--------------------|-----------------|-----------|-------------------------------------|--------------------|----------------------------------------------------------------------------------|
|      |                             |              |                | Obs/Exp   | P-value   | Observed Frequency in Ago footprint | Expected frequency | Obs/Exp         | P-value   | Observed Frequency in Ago Footprint | Expected frequency |                                                                                  |
| 1    | 8417151                     | miR-30       | TGTTTACA       | 7.002     | 1.99E-175 | 155                                 | 22                 | 13.332          | 3.78E-297 | 119                                 | 9                  | miR-30c:miR-30b:miR-30a:miR-30e:miR-30d:miR-384-5p                               |
| 1    | 8417151                     | miR-30       | TGTTTAC        | 4.931     | 6.21E-167 | 242                                 | 49                 | 10.458          | 5.25E-307 | 164                                 | 16                 | miR-30c:miR-30b:miR-30a:miR-30e:miR-30d:miR-384-5p                               |
| 1    | 8417151                     | miR-30       | GTTTACA        | 4.273     | 3.10E-113 | 204                                 | 48                 | 8.735           | 2.10E-228 | 152                                 | 17                 | miR-30c:miR-30b:miR-30a:miR-30e:miR-30d:miR-384-5p                               |
| 1    | 8417151                     | miR-30       | GTTTAC         | 3.085     | 5.55E-109 | 349                                 | 113                | 6.889           | 7.48E-255 | 231                                 | 34                 | miR-30c:miR-30b:miR-30a:miR-30e:miR-30d:miR-384-5p                               |
| 1    | 8417151                     | miR-30       | TGTTTA         | 2.055     | 6.92E-52  | 424                                 | 206                | 4.772           | 7.35E-161 | 245                                 | 51                 | miR-30c:miR-30b:miR-30a:miR-30e:miR-30d:miR-384-5p                               |
| 1    | 8417151                     | miR-30       | TTTACA         | 1.905     | 3.52E-39  | 399                                 | 209                | 4.237           | 2.16E-128 | 235                                 | 55                 | miR-30c:miR-30b:miR-30a:miR-30e:miR-30d:miR-384-5p                               |
| 1    |                             | miR-30       | with all 6mers | 2.216     | 4.53E-172 | 1172                                | 529                | 5.066           | 0.00E+00  | 711                                 | 140                |                                                                                  |
| 2    | 2309955                     | miR-9        | ACCAAAGA       | 6.381     | 8.87E-170 | 170                                 | 27                 | 11.190          | 4.66E-234 | 115                                 | 10                 | miR-9                                                                            |
| 2    | 2309955                     | miR-9        | CCAAAGA        | 4.317     | 1.58E-252 | 452                                 | 105                | 8.223           | 0.00E+00  | 299                                 | 36                 | miR-9                                                                            |
| 2    | 2309955                     | miR-9        | ACCAAAG        | 4.107     | 1.23E-166 | 322                                 | 78                 | 7.773           | 8.79E-264 | 204                                 | 26                 | miR-9                                                                            |
| 2    | 2325768                     | miR-9        | ACCAAAA        | 3.006     | 2.70E-209 | 712                                 | 237                | 5.833           | 0.00E+00  | 398                                 | 68                 | miR-9:miR-133a:miR-133b                                                          |
| 2    | 2309955                     | miR-9        | CCAAAG         | 2.847     | 8.84E-243 | 924                                 | 325                | 5.604           | 0.00E+00  | 548                                 | 98                 | miR-9:miR-1897-5p                                                                |
| 2    | 2309955                     | miR-9        | CAAAGA         | 2.013     | 5.44E-85  | 749                                 | 372                | 4.167           | 7.66E-233 | 441                                 | 106                | miR-9                                                                            |
| 2    |                             | miR-9        | with all 6mers | 2.555     | 0.00E+00  | 2385                                | 934                | 5.102           | 0.00E+00  | 1387                                | 272                |                                                                                  |
| 3    | 2050154                     | miR-181      | TGAATGTT       | 3.044     | 3.84E-15  | 45                                  | 15                 | 8.177           | 4.00E-36  | 25                                  | 3                  | miR-181d:miR-181a:miR-181c:miR-181b                                              |
| 3    | 2050281                     | miR-181      | GAATGTT        | 1.879     | 9.63E-10  | 91                                  | 48                 | 4.105           | 3.26E-22  | 40                                  | 10                 | miR-181d:miR-181a:miR-181c:miR-181b:miR-543                                      |
| 3    | 2050154                     | miR-181      | TGAATGT        | 2.966     | 1.86E-65  | 224                                 | 76                 | 6.383           | 1.82E-121 | 121                                 | 19                 | miR-181d:miR-181a:miR-181c:miR-181b                                              |
| 3    | 2050281                     | miR-181      | GAATGT         | 1.903     | 7.36E-41  | 418                                 | 220                | 3.688           | 3.21E-87  | 200                                 | 54                 | miR-181d:miR-181a:miR-181c:miR-181b:miR-543                                      |
| 3    | 2050281                     | miR-181      | GAATGT         | 1.541     | 1.62E-15  | 334                                 | 217                | 2.803           | 3.56E-36  | 136                                 | 49                 | miR-181d:miR-181a:miR-181c:miR-181b:miR-543                                      |
| 3    | 2050154                     | miR-181      | TGAATG         | 1.783     | 1.28E-34  | 438                                 | 246                | 3.388           | 1.79E-85  | 228                                 | 67                 | miR-181d:miR-181a:miR-181c:miR-181b                                              |
| 3    |                             | miR-181      | with all 6mers | 1.745     | 2.77E-84  | 1190                                | 682                | 3.317           | 1.59E-200 | 564                                 | 170                |                                                                                  |
| 4    | 1581514                     | miR-26       | TACTTGAA       | 6.130     | 2.42E-81  | 85                                  | 14                 | 9.901           | 5.21E-89  | 50                                  | 5                  | miR-26a:miR-26b                                                                  |
| 4    | 1581514                     | miR-26       | TACTTGA        | 3.600     | 8.61E-54  | 127                                 | 35                 | 6.661           | 6.26E-69  | 64                                  | 10                 | miR-26a:miR-26b                                                                  |
| 4    | 1581514                     | miR-26       | ACTTGAA        | 2.754     | 6.80E-46  | 181                                 | 66                 | 6.260           | 8.00E-106 | 108                                 | 17                 | miR-26a:miR-26b                                                                  |
| 4    | 1581514                     | miR-26       | ACTTGA         | 1.920     | 4.13E-35  | 347                                 | 181                | 4.351           | 4.96E-94  | 164                                 | 38                 | miR-26a:miR-26b                                                                  |
| 4    | 1581514                     | miR-26       | CTTGAA         | 1.811     | 3.12E-34  | 410                                 | 226                | 4.152           | 3.65E-108 | 204                                 | 49                 | miR-26a:miR-26b                                                                  |
| 4    | 1581514                     | miR-26       | TACTTG         | 1.959     | 1.85E-28  | 261                                 | 133                | 3.876           | 5.40E-46  | 95                                  | 25                 | miR-26a:miR-26b                                                                  |
| 4    |                             | miR-26       | with all 6mers | 1.884     | 9.23E-94  | 1018                                | 540                | 4.158           | 1.61E-243 | 463                                 | 111                |                                                                                  |
| 5    | 1530176                     | let-7        | CTACCTCA       | 9.250     | 5.66E-306 | 190                                 | 21                 | 14.866          | 0.00E+00  | 140                                 | 9                  | miR-98:let-7c:let-7b:let-7a:let-7g:let-7f:let-7e:let-7i                          |
| 5    | 1549064                     | let-7        | CTACCTC        | 6.118     | 0.00E+00  | 364                                 | 59                 | 11.358          | 0.00E+00  | 255                                 | 22                 | miR-98:let-7c:let-7b:let-7a:let-7g:let-7f:let-7e:let-7d:let-7i                   |
| 5    | 1530176                     | let-7        | TACCTCA        | 6.627     | 0.00E+00  | 370                                 | 56                 | 12.152          | 0.00E+00  | 273                                 | 22                 | miR-98:let-7c:let-7b:let-7a:let-7g:let-7f:let-7e:let-7i                          |
| 5    | 1551121                     | let-7        | CTACCT         | 2.501     | 5.76E-108 | 541                                 | 216                | 4.987           | 9.10E-222 | 317                                 | 64                 | miR-98:let-7c:let-7b:let-7a:let-7g:let-7f:let-7e:let-7d:let-7i:miR-196a:miR-196b |
| 5    | 1549232                     | let-7        | TACCTC         | 4.479     | 0.00E+00  | 706                                 | 158                | 9.295           | 0.00E+00  | 467                                 | 50                 | miR-98:let-7c:let-7b:let-7a:let-7g:let-7f:let-7e:let-7d:miR-202-3p:let-7i        |
| 5    | 1533600                     | let-7        | ACCTCA         | 2.755     | 6.59E-191 | 777                                 | 282                | 5.674           | 0.00E+00  | 453                                 | 80                 | miR-98:let-7c:let-7b:let-7a:let-7g:let-7f:let-7e:let-7i:miR-672                  |
| 5    |                             | let-7        | with all 6mers | 3.085     | 0.00E+00  | 2024                                | 656                | 6.388           | 0.00E+00  | 1237                                | 194                |                                                                                  |
| 6    | 1188538                     | miR-27       | ACTGTGAA       | 2.990     | 2.69E-26  | 85                                  | 28                 | 6.255           | 5.76E-49  | 49                                  | 8                  | miR-27b:miR-27a                                                                  |
| 6    | 1211720                     | miR-27       | ACTGTGA        | 2.525     | 1.31E-48  | 233                                 | 92                 | 4.613           | 9.24E-81  | 128                                 | 28                 | miR-128:miR-27b:miR-27a                                                          |
| 6    | 1188538                     | miR-27       | CTGTGAA        | 1.753     | 2.78E-15  | 193                                 | 110                | 3.622           | 4.22E-41  | 95                                  | 26                 | miR-27b:miR-27a                                                                  |
| 6    | 1219457                     | miR-27       | CTGTGA         | 1.559     | 1.21E-28  | 615                                 | 394                | 2.850           | 1.98E-77  | 289                                 | 101                | miR-673-5p:miR-128:miR-27b:miR-27a                                               |
| 6    | 1211720                     | miR-27       | ACTGTG         | 1.879     | 8.57E-61  | 658                                 | 350                | 3.865           | 1.94E-136 | 291                                 | 75                 | miR-128:miR-27b:miR-27a                                                          |
| 6    | 1189726                     | miR-27       | TGTGAA         | 1.480     | 1.74E-18  | 495                                 | 335                | 2.553           | 2.14E-50  | 236                                 | 92                 | miR-27b:miR-27a:miR-350                                                          |
| 6    |                             | miR-27       | with all 6mers | 1.638     | 1.31E-97  | 1768                                | 1079               | 3.032           | 1.35E-243 | 816                                 | 269                |                                                                                  |
| 7    | 1172287                     | miR-708      | AGCTCCTT       | 0.839     | 4.68E-01  | 17                                  | 20                 | 1.391           | 5.66E-01  | 3                                   | 2                  | miR-708:miR-28                                                                   |
| 7    | 1172287                     | miR-708      | GCTCCTT        | 0.718     | 1.99E-02  | 49                                  | 68                 | 1.287           | 3.80E-01  | 12                                  | 9                  | miR-708:miR-28                                                                   |
| 7    | 1172287                     | miR-708      | AGCTCCT        | 0.562     | 1.44E-05  | 55                                  | 98                 | 0.713           | 2.82E-01  | 10                                  | 14                 | miR-708:miR-28                                                                   |
| 7    | 1172287                     | miR-708      | CTCCTT         | 0.934     | 2.55E-01  | 275                                 | 295                | 1.497           | 7.46E-04  | 69                                  | 46                 | miR-708:miR-28                                                                   |
| 7    | 1172287                     | miR-708      | AGCTCC         | 0.582     | 2.19E-13  | 179                                 | 308                | 0.925           | 5.85E-01  | 49                                  | 53                 | miR-708:miR-28                                                                   |
| 7    | 1172287                     | miR-708      | GCTCCT         | 0.574     | 1.52E-14  | 187                                 | 326                | 0.813           | 1.68E-01  | 44                                  | 54                 | miR-708:miR-28                                                                   |
| 7    |                             | miR-708      | with all 6mers | 0.691     | 4.55E-21  | 641                                 | 928                | 1.057           | 4.78E-01  | 162                                 | 153                |                                                                                  |
| 8    | 735430                      | miR-124      | GTGCCTTA       | 12.685    | 1.48E-294 | 125                                 | 10                 | 20.229          | 0.00E+00  | 82                                  | 4                  | miR-124                                                                          |
| 8    | 735430                      | miR-124      | TGCCTTA        | 7.277     | 0.00E+00  | 324                                 | 45                 | 13.758          | 0.00E+00  | 212                                 | 15                 | miR-124                                                                          |
| 8    | 735430                      | miR-124      | GTGCCTT        | 6.299     | 0.00E+00  | 415                                 | 66                 | 12.725          | 0.00E+00  | 281                                 | 22                 | miR-124                                                                          |
| 8    | 735430                      | miR-124      | GCCTTA         | 4.358     | 2.02E-302 | 534                                 | 123                | 9.744           | 0.00E+00  | 335                                 | 34                 | miR-124                                                                          |
| 8    | 735430                      | miR-124      | TGCCTT         | 3.155     | 0.00E+00  | 1020                                | 323                | 7.489           | 0.00E+00  | 605                                 | 81                 | miR-124                                                                          |
| 8    | 735430                      | miR-124      | GTGCCT         | 2.877     | 1.32E-198 | 738                                 | 256                | 6.866           | 0.00E+00  | 453                                 | 66                 | miR-124                                                                          |
| 8    |                             | miR-124      | with all 6mers | 3.263     | 0.00E+00  | 2292                                | 702                | 7.690           | 0.00E+00  | 1393                                | 181                |                                                                                  |
| 9    | 270706                      | miR-34       | CACTGCCA       | 0.615     | 2.81E-02  | 20                                  | 33                 | 1.344           | 4.01E-01  | 8                                   | 6                  | miR-34a:miR-449a                                                                 |
| 9    | 333089                      | miR-34       | CACTGCC        | 0.879     | 2.23E-01  | 89                                  | 101                | 1.807           | 1.23E-03  | 29                                  | 16                 | miR-699:miR-34c:miR-34a:miR-34b-5p:miR-449b:miR-449c:miR-449a                    |
| 9    | 270706                      | miR-34       | ACTGCCA        | 0.948     | 6.36E-01  | 77                                  | 81                 | 1.931           | 9.35E-05  | 34                                  | 18                 | miR-34a:miR-449a                                                                 |
| 9    | 333089                      | miR-34       | ACTGCC         | 1.024     | 7.03E-01  | 259                                 | 253                | 2.062           | 3.50E-14  | 105                                 | 51                 | miR-699:miR-34c:miR-34a:miR-34b-5p:miR-449b:miR-449c:miR-449a                    |
| 9    | 333089                      | miR-34       | CACTGC         | 0.857     | 1.34E-02  | 257                                 | 300                | 1.595           | 3.13E-05  | 78                                  | 49                 | miR-699:miR-34c:miR-34a:miR-34b-5p:miR-449b:miR-449c:miR-449a                    |
| 9    | 270706                      | miR-34       | CTGCCA         | 0.930     | 1.58E-01  | 379                                 | 408                | 1.602           | 1.00E-08  | 145                                 | 90                 | miR-34a:miR-449a                                                                 |
| 9    |                             | miR-34       | with all 6mers | 0.932     | 3.51E-02  | 895                                 | 960                | 1.724           | 1.83E-23  | 328                                 | 190                |                                                                                  |
| 10   | 330186                      | miR-125      | CTCAGGGA       | 2.365     | 2.79E-12  | 62                                  | 26                 | 7.292           | 1.60E-51  | 42                                  | 6                  | miR-125b-5p:miR-351:miR-125a-5p                                                  |
| 10   | 332795                      | miR-125      | TCAGGGA        | 1.459     | 7.81E-05  | 108                                 | 74                 | 4.251           | 1.75E-36  | 64                                  | 15                 | miR-125b-5p:miR-351:miR-125a-5p:miR-670                                          |
| 10   | 330186                      | miR-125      | CTCAGGG        | 1.415     | 1.72E-04  | 116                                 | 82                 | 4.476           | 4.74E-40  | 65                                  | 15                 | miR-125b-5p:miR-351:miR-125a-5p                                                  |
| 10   | 333749                      | miR-125      | CAGGGA         | 0.738     | 2.06E-06  | 242                                 | 328                | 2.025           | 9.18E-14  | 107                                 | 53                 | miR-125b-5p:miR-351:miR-339-5p:miR-125a-5p:miR-670                               |
| 10   | 332795                      | miR-125      | CTCAGG         | 0.951     | 4.61E-01  | 219                                 | 230                | 2.807           | 1.21E-28  | 106                                 | 38                 | miR-125b-5p:miR-351:miR-125a-5p:miR-670                                          |
| 10   | 330186                      | miR-125      | CTCAGG         | 1.055     | 3.17E-01  | 351                                 | 333                | 2.745           | 3.38E-42  | 167                                 | 61                 | miR-125b-5p:miR-351:miR-125a-5p                                                  |
| 10   |                             | miR-125      | with all 6mers | 0.911     | 8.20E-03  | 812                                 | 891                | 2.509           | 5.17E-77  | 380                                 | 151                |                                                                                  |

### Supplemental Table 3 (continued)

#### All seeds

#### Conserved seeds

| Rank | Frequency in Ago miRNA CLIP | miRNA family   | Seed motif | Obs/Exp  | P-value  | Observed Frequency in Ago footprint | Expected frequency | Obs/Exp   | P-value  | Observed Frequency in Ago Footprint | Expected frequency | miRNAs                                                                                                                                                                                        |
|------|-----------------------------|----------------|------------|----------|----------|-------------------------------------|--------------------|-----------|----------|-------------------------------------|--------------------|-----------------------------------------------------------------------------------------------------------------------------------------------------------------------------------------------|
| 11   | 307064                      | miR-193        | GGCCAGTT   | 0.894    | 6.99E-01 | 12                                  | 13                 | 1.242     | 7.07E-01 | 3                                   | 2                  | miR-193.miR-193b                                                                                                                                                                              |
| 11   | 307064                      | miR-193        | GGCCAGT    | 0.669    | 6.62E-03 | 45                                  | 67                 | 1.561     | 5.04E-02 | 19                                  | 12                 | miR-193.miR-193b                                                                                                                                                                              |
| 11   | 307064                      | miR-193        | GCCAGTT    | 0.906    | 5.12E-01 | 44                                  | 49                 | 0.830     | 5.98E-01 | 8                                   | 10                 | miR-193.miR-193b                                                                                                                                                                              |
| 11   | 330471                      | miR-193        | GGCCAG     | 0.468    | 4.85E-25 | 177                                 | 378                | 0.819     | 9.66E-02 | 69                                  | 84                 | miR-328.miR-193.miR-193b                                                                                                                                                                      |
| 11   | 307064                      | miR-193        | GCCAGT     | 0.814    | 3.64E-03 | 198                                 | 243                | 1.298     | 3.67E-02 | 64                                  | 49                 | miR-193.miR-193b                                                                                                                                                                              |
| 11   | 307064                      | miR-193        | CCAGTT     | 0.893    | 1.06E-01 | 203                                 | 227                | 1.114     | 4.27E-01 | 54                                  | 48                 | miR-193.miR-193b                                                                                                                                                                              |
| 11   | miR-193                     | with all 6mers | 0.681      | 1.51E-20 | 578      | 849                                 | 1.027              | 7.13E-01  | 187      | 182                                 |                    |                                                                                                                                                                                               |
| 12   | 138054                      | miR-17         | GCACCTTG   | 1.311    | 2.14E-01 | 21                                  | 16                 | 2.760     | 4.42E-04 | 11                                  | 4                  | miR-17.miR-20b.miR-93.miR-106a                                                                                                                                                                |
| 12   | 297690                      | miR-17         | GCACCTT    | 1.815    | 4.51E-09 | 94                                  | 52                 | 3.806     | 1.22E-30 | 64                                  | 17                 | miR-17.miR-292-3p.miR-291b-3p.miR-295.miR-294.miR-20b.miR-20a.miR-93.miR-106a.miR-106b.miR-290-3p.miR-291a-3p                                                                                 |
| 12   | 138054                      | miR-17         | CACCTTG    | 1.001    | 9.91E-01 | 66                                  | 66                 | 1.845     | 2.30E-03 | 24                                  | 13                 | miR-17.miR-20b.miR-93.miR-106a                                                                                                                                                                |
| 12   | 306438                      | miR-17         | GCACCT     | 1.306    | 7.00E-05 | 221                                 | 169                | 2.784     | 3.44E-30 | 114                                 | 41                 | miR-17.miR-292-3p.miR-291b-3p.miR-295.miR-294.miR-467b.miR-467c.miR-20b.miR-20a.miR-93.miR-105.miR-302b.miR-302c.miR-302a.miR-302d.miR-467d.miR-106a.miR-106b.miR-467a.miR-290-3p.miR-291a-3p |
| 12   | 297690                      | miR-17         | CACCTT     | 1.233    | 6.16E-04 | 267                                 | 217                | 2.834     | 3.62E-35 | 129                                 | 46                 | miR-17.miR-292-3p.miR-291b-3p.miR-295.miR-294.miR-20b.miR-20a.miR-93.miR-106a.miR-106b.miR-290-3p.miR-291a-3p                                                                                 |
| 12   | 138054                      | miR-17         | ACTTTG     | 1.022    | 7.14E-01 | 282                                 | 276                | 1.628     | 7.01E-08 | 120                                 | 74                 | miR-17.miR-20b.miR-93.miR-106a                                                                                                                                                                |
| 12   | miR-17                      | with all 6mers | 1.164      | 2.59E-05 | 770      | 662                                 | 2.266              | 8.46E-58  | 363      | 160                                 |                    |                                                                                                                                                                                               |
| 13   | 277918                      | miR-344        | CTAGATCA   | 1.522    | 2.63E-01 | 7                                   | 5                  | 1.928     | 5.04E-01 | 1                                   | 1                  | miR-344                                                                                                                                                                                       |
| 13   | 277918                      | miR-344        | CTAGATC    | 1.312    | 2.02E-01 | 22                                  | 17                 | 2.873     | 2.71E-02 | 4                                   | 1                  | miR-344                                                                                                                                                                                       |
| 13   | 277918                      | miR-344        | TAGATCA    | 1.452    | 4.72E-02 | 28                                  | 19                 | 2.201     | 3.22E-02 | 7                                   | 3                  | miR-344                                                                                                                                                                                       |
| 13   | 278382                      | miR-344        | CTAGAT     | 1.323    | 2.83E-03 | 113                                 | 85                 | 2.714     | 3.46E-07 | 24                                  | 9                  | miR-878-5p.miR-344                                                                                                                                                                            |
| 13   | 277918                      | miR-344        | TAGATC     | 1.308    | 1.36E-02 | 84                                  | 64                 | 2.456     | 5.33E-06 | 24                                  | 10                 | miR-344                                                                                                                                                                                       |
| 13   | 277918                      | miR-344        | AGATCA     | 0.856    | 2.99E-02 | 194                                 | 227                | 1.041     | 7.41E-01 | 69                                  | 66                 | miR-344                                                                                                                                                                                       |
| 13   | miR-344                     | with all 6mers | 1.039      | 4.49E-01 | 391      | 376                                 | 1.378              | 4.99E-04  | 117      | 85                                  |                    |                                                                                                                                                                                               |
| 14   | 273527                      | miR-138        | CACCAGCT   | 0.745    | 1.48E-01 | 24                                  | 32                 | 1.954     | 1.07E-02 | 14                                  | 7                  | miR-138                                                                                                                                                                                       |
| 14   | 273527                      | miR-138        | CACCAGC    | 0.807    | 3.51E-02 | 96                                  | 119                | 1.837     | 3.84E-06 | 56                                  | 30                 | miR-138                                                                                                                                                                                       |
| 14   | 273527                      | miR-138        | ACCAGCT    | 0.821    | 7.92E-02 | 79                                  | 96                 | 1.439     | 2.41E-02 | 38                                  | 26                 | miR-138                                                                                                                                                                                       |
| 14   | 274185                      | miR-138        | CCAGCT     | 0.660    | 6.00E-13 | 295                                 | 447                | 1.022     | 8.17E-01 | 111                                 | 109                | miR-763.miR-138                                                                                                                                                                               |
| 14   | 273527                      | miR-138        | ACCAGC     | 0.870    | 1.91E-02 | 282                                 | 324                | 1.621     | 1.41E-09 | 154                                 | 95                 | miR-138                                                                                                                                                                                       |
| 14   | 273527                      | miR-138        | CACCAG     | 0.699    | 1.66E-08 | 245                                 | 351                | 1.166     | 1.27E-01 | 99                                  | 85                 | miR-138                                                                                                                                                                                       |
| 14   | miR-138                     | with all 6mers | 0.732      | 3.21E-19 | 822      | 1122                                | 1.262              | 8.82E-06  | 364      | 289                                 |                    |                                                                                                                                                                                               |
| 15   | 213825                      | miR-15         | TGCTGCTA   | 3.649    | 4.53E-34 | 77                                  | 21                 | 8.520     | 1.10E-59 | 40                                  | 5                  | miR-15b.miR-15a.miR-16.miR-195                                                                                                                                                                |
| 15   | 250252                      | miR-15         | TGCTGCT    | 1.724    | 1.77E-24 | 343                                 | 199                | 2.862     | 2.38E-40 | 146                                 | 51                 | miR-15b.miR-15a.miR-16.miR-322.miR-195.miR-497.miR-1907.miR-103.miR-107                                                                                                                       |
| 15   | 214894                      | miR-15         | GCTGCTA    | 2.072    | 4.41E-16 | 119                                 | 57                 | 4.666     | 1.37E-37 | 57                                  | 12                 | miR-15b.miR-15a.miR-16.miR-195.miR-503                                                                                                                                                        |
| 15   | 251321                      | miR-15         | GCTGCT     | 1.080    | 6.14E-02 | 597                                 | 553                | 1.807     | 2.19E-22 | 263                                 | 146                | miR-15b.miR-15a.miR-16.miR-322.miR-195.miR-497.miR-1907.miR-503.miR-103.miR-107                                                                                                               |
| 15   | 250938                      | miR-15         | TGCTGC     | 1.275    | 6.23E-10 | 644                                 | 505                | 2.060     | 2.15E-36 | 291                                 | 141                | miR-15b.miR-15a.miR-16.miR-322.miR-195.miR-497.miR-1907.miR-1906.miR-761.miR-103.miR-107                                                                                                      |
| 15   | 214894                      | miR-15         | CTGCTA     | 1.485    | 3.03E-11 | 279                                 | 188                | 2.939     | 1.17E-29 | 100                                 | 34                 | miR-15b.miR-15a.miR-16.miR-195.miR-503                                                                                                                                                        |
| 15   | miR-15                      | with all 6mers | 1.220      | 8.23E-15 | 1520     | 1246                                | 2.038              | 3.33E-77  | 654      | 321                                 |                    |                                                                                                                                                                                               |
| 16   | 179104                      | miR-101        | GTAAGCTA   | 3.500    | 6.15E-13 | 29                                  | 8                  | 8.574     | 7.12E-34 | 22                                  | 3                  | miR-101a.miR-101b                                                                                                                                                                             |
| 16   | 195599                      | miR-101        | TACTGTA    | 2.869    | 1.40E-32 | 116                                 | 40                 | 6.778     | 1.86E-69 | 63                                  | 9                  | miR-101a.miR-101b.miR-144                                                                                                                                                                     |
| 16   | 179104                      | miR-101        | GTAAGCT    | 1.948    | 6.54E-09 | 73                                  | 37                 | 4.637     | 1.64E-23 | 35                                  | 8                  | miR-101a.miR-101b                                                                                                                                                                             |
| 16   | 208225                      | miR-101        | ACTGTA     | 1.901    | 3.54E-33 | 337                                 | 177                | 4.463     | 2.77E-80 | 134                                 | 30                 | miR-101a.miR-101b.miR-139-5p.miR-144.miR-582-5p                                                                                                                                               |
| 16   | 198109                      | miR-101        | TACTGT     | 2.136    | 2.67E-53 | 391                                 | 183                | 4.269     | 4.21E-89 | 160                                 | 37                 | miR-101a.miR-101b.miR-144.miR-199b.miR-199a-3p                                                                                                                                                |
| 16   | 179104                      | miR-101        | GTAAGT     | 1.363    | 1.57E-05 | 193                                 | 142                | 2.809     | 5.25E-20 | 72                                  | 26                 | miR-101a.miR-101b                                                                                                                                                                             |
| 16   | miR-101                     | with all 6mers | 1.835      | 4.42E-78 | 921      | 502                                 | 3.930              | 7.24E-176 | 366      | 93                                  |                    |                                                                                                                                                                                               |
| 17   | 207067                      | miR-153        | CTATGCAA   | 3.011    | 1.72E-09 | 27                                  | 9                  | 6.289     | 4.02E-21 | 20                                  | 3                  | miR-153                                                                                                                                                                                       |
| 17   | 208220                      | miR-153        | TATGCAA    | 2.421    | 7.07E-18 | 89                                  | 37                 | 4.775     | 1.57E-39 | 58                                  | 12                 | miR-153.miR-448                                                                                                                                                                               |
| 17   | 207067                      | miR-153        | CTATGCA    | 1.789    | 4.60E-07 | 73                                  | 41                 | 5.233     | 2.23E-38 | 49                                  | 9                  | miR-153                                                                                                                                                                                       |
| 17   | 208220                      | miR-153        | TATGCA     | 1.604    | 4.23E-13 | 231                                 | 144                | 3.146     | 2.05E-40 | 121                                 | 38                 | miR-153.miR-448.miR-669j.miR-669k.miR-669l.miR-669h-3p                                                                                                                                        |
| 17   | 208220                      | miR-153        | ATGCAA     | 1.521    | 1.99E-11 | 252                                 | 166                | 3.043     | 5.62E-41 | 131                                 | 43                 | miR-153.miR-448                                                                                                                                                                               |
| 17   | 207067                      | miR-153        | CTATGC     | 1.407    | 2.01E-06 | 192                                 | 136                | 3.171     | 3.08E-32 | 94                                  | 30                 | miR-153                                                                                                                                                                                       |
| 17   | miR-153                     | with all 6mers | 1.513      | 2.41E-27 | 675      | 446                                 | 3.113              | 6.39E-110 | 346      | 111                                 |                    |                                                                                                                                                                                               |
| 18   | 153999                      | miR-19         | TTTGACA    | 1.969    | 2.67E-05 | 37                                  | 19                 | 4.159     | 2.81E-15 | 26                                  | 6                  | miR-19b.miR-19a                                                                                                                                                                               |
| 18   | 153999                      | miR-19         | TTTGAC     | 1.977    | 1.63E-11 | 94                                  | 48                 | 4.052     | 7.39E-33 | 62                                  | 15                 | miR-19b.miR-19a                                                                                                                                                                               |
| 18   | 153999                      | miR-19         | TTGCACA    | 1.542    | 1.43E-04 | 76                                  | 49                 | 3.869     | 1.52E-23 | 47                                  | 12                 | miR-19b.miR-19a                                                                                                                                                                               |
| 18   | 201896                      | miR-19         | TTGCAC     | 1.669    | 2.02E-14 | 218                                 | 131                | 3.937     | 5.46E-62 | 126                                 | 32                 | miR-301b.miR-301a.miR-19b.miR-19a.miR-130a.miR-130b.miR-721                                                                                                                                   |
| 18   | 153999                      | miR-19         | TTTGCA     | 1.161    | 1.25E-02 | 278                                 | 239                | 2.051     | 2.86E-18 | 141                                 | 69                 | miR-19b.miR-19a                                                                                                                                                                               |
| 18   | 155631                      | miR-19         | TGCACA     | 0.929    | 2.52E-01 | 242                                 | 260                | 1.801     | 6.66E-10 | 107                                 | 59                 | miR-466h.miR-466j.miR-19b.miR-19a                                                                                                                                                             |
| 18   | miR-19                      | with all 6mers | 1.171      | 1.84E-05 | 738      | 630                                 | 2.335              | 4.62E-64  | 374      | 160                                 |                    |                                                                                                                                                                                               |
| 19   | 194366                      | miR-21         | ATAAGCTA   | 1.956    | 2.34E-02 | 11                                  | 6                  | 3.096     | 3.91E-02 | 3                                   | 1                  | miR-21                                                                                                                                                                                        |
| 19   | 194811                      | miR-21         | ATAAGCT    | 1.429    | 2.51E-02 | 39                                  | 27                 | 3.144     | 1.31E-05 | 13                                  | 4                  | miR-590-5p.miR-21                                                                                                                                                                             |
| 19   | 194366                      | miR-21         | TAAGCTA    | 1.559    | 1.79E-02 | 28                                  | 18                 | 4.211     | 7.50E-07 | 10                                  | 2                  | miR-21                                                                                                                                                                                        |
| 19   | 194811                      | miR-21         | ATAAGC     | 1.291    | 5.62E-03 | 117                                 | 91                 | 2.907     | 2.86E-12 | 39                                  | 13                 | miR-590-5p.miR-21                                                                                                                                                                             |
| 19   | 194811                      | miR-21         | TAAGCT     | 1.349    | 3.78E-04 | 140                                 | 104                | 2.695     | 1.95E-10 | 38                                  | 14                 | miR-590-5p.miR-21                                                                                                                                                                             |
| 19   | 194366                      | miR-21         | AAGCTA     | 1.136    | 9.14E-02 | 175                                 | 154                | 2.485     | 1.09E-11 | 52                                  | 21                 | miR-21                                                                                                                                                                                        |
| 19   | miR-21                      | with all 6mers | 1.240      | 7.65E-06 | 432      | 348                                 | 2.663              | 5.49E-31  | 129      | 48                                  |                    |                                                                                                                                                                                               |
| 20   | 155769                      | miR-221        | ATGTAGCT   | 1.317    | 3.02E-01 | 14                                  | 11                 | 3.856     | 3.63E-03 | 4                                   | 1                  | miR-221.miR-222                                                                                                                                                                               |
| 20   | 155769                      | miR-221        | TGTAGCT    | 1.257    | 8.33E-02 | 57                                  | 45                 | 2.913     | 5.32E-05 | 13                                  | 4                  | miR-221.miR-222                                                                                                                                                                               |
| 20   | 155769                      | miR-221        | ATGTAGC    | 1.153    | 3.92E-01 | 36                                  | 31                 | 2.729     | 1.61E-04 | 13                                  | 5                  | miR-221.miR-222                                                                                                                                                                               |
| 20   | 155769                      | miR-221        | ATGTAG     | 1.182    | 4.42E-02 | 145                                 | 123                | 2.583     | 1.44E-11 | 47                                  | 18                 | miR-221.miR-222                                                                                                                                                                               |
| 20   | 155769                      | miR-221        | TGTAGC     | 1.143    | 9.79E-02 | 153                                 | 134                | 2.424     | 2.02E-09 | 43                                  | 18                 | miR-221.miR-222                                                                                                                                                                               |
| 20   | 155769                      | miR-221        | GTAGCT     | 1.000    | 9.99E-01 | 116                                 | 116                | 2.311     | 1.58E-06 | 31                                  | 13                 | miR-221.miR-222                                                                                                                                                                               |
| 20   | miR-221                     | with all 6mers | 1.111      | 3.19E-02 | 414      | 373                                 | 2.452              | 2.01E-24  | 121      | 49                                  |                    |                                                                                                                                                                                               |

Supplemental Table 3 (continued)

| Rank | Frequency in Ago miRNA CLIP | miRNA family     | Seed motif | All seeds |          |                                     | Conserved seeds    |         |           | miRNAs |                                     |                                                                                                                                                                                      |
|------|-----------------------------|------------------|------------|-----------|----------|-------------------------------------|--------------------|---------|-----------|--------|-------------------------------------|--------------------------------------------------------------------------------------------------------------------------------------------------------------------------------------|
|      |                             |                  |            | Obs/Exp   | P-value  | Observed Frequency in Ago footprint | Expected frequency | Obs/Exp | P-value   |        | Observed Frequency in Ago Footprint | Expected frequency                                                                                                                                                                   |
| 21   | 116912                      | miR-374          | TATTATAT   | 1.071     | 8.04E-01 | 13                                  | 12                 | 2.220   | 6.71E-02  | 5      | 2                                   | miR-374                                                                                                                                                                              |
| 21   | 116912                      | miR-374          | TATTATA    | 1.195     | 2.48E-01 | 42                                  | 35                 | 3.489   | 1.65E-10  | 23     | 7                                   | miR-374                                                                                                                                                                              |
| 21   | 116912                      | miR-374          | ATTATAT    | 0.830     | 2.75E-01 | 34                                  | 41                 | 1.518   | 1.63E-01  | 11     | 7                                   | miR-374                                                                                                                                                                              |
| 21   | 171240                      | miR-374          | TTATAT     | 1.058     | 4.53E-01 | 179                                 | 169                | 1.780   | 1.01E-06  | 70     | 39                                  | miR-410:miR-374                                                                                                                                                                      |
| 21   | 116912                      | miR-374          | ATTATA     | 1.216     | 1.61E-02 | 151                                 | 124                | 2.223   | 4.70E-09  | 51     | 23                                  | miR-374                                                                                                                                                                              |
| 21   | 119877                      | miR-374          | TATTAT     | 1.135     | 1.03E-01 | 165                                 | 145                | 1.928   | 3.57E-07  | 58     | 30                                  | miR-369-3p:miR-374                                                                                                                                                                   |
| 21   | miR-374                     | with all 6mers   |            | 1.128     | 7.26E-03 | 495                                 | 439                | 1.938   | 1.96E-19  | 179    | 92                                  |                                                                                                                                                                                      |
| 22   | 154156                      | miR-22           | GGCAGCTT   | 0.764     | 2.65E-01 | 17                                  | 22                 | 1.018   | 9.72E-01  | 4      | 4                                   | miR-22                                                                                                                                                                               |
| 22   | 154156                      | miR-22           | GCAGCTT    | 0.800     | 7.21E-02 | 65                                  | 81                 | 1.590   | 2.49E-02  | 23     | 14                                  | miR-22                                                                                                                                                                               |
| 22   | 154156                      | miR-22           | GGCAGCT    | 0.626     | 5.50E-05 | 73                                  | 117                | 0.957   | 8.24E-01  | 26     | 27                                  | miR-22                                                                                                                                                                               |
| 22   | 157986                      | miR-22           | CAGCTT     | 0.884     | 3.83E-02 | 283                                 | 320                | 1.652   | 1.55E-07  | 107    | 65                                  | miR-320:miR-22                                                                                                                                                                       |
| 22   | 154156                      | miR-22           | GCAGCT     | 0.623     | 1.49E-15 | 279                                 | 448                | 0.906   | 2.98E-01  | 111    | 123                                 | miR-22                                                                                                                                                                               |
| 22   | 154156                      | miR-22           | GGCAGC     | 0.452     | 1.73E-29 | 191                                 | 423                | 0.652   | 3.48E-04  | 69     | 106                                 | miR-22                                                                                                                                                                               |
| 22   | miR-22                      | with all 6mers   |            | 0.632     | 7.09E-37 | 753                                 | 1191               | 0.979   | 7.22E-01  | 287    | 293                                 |                                                                                                                                                                                      |
| 23   | 156668                      | miR-20           | GCACCTTA   | 3.574     | 1.10E-18 | 42                                  | 12                 | 6.309   | 5.66E-32  | 31     | 5                                   | miR-20a:miR-106b                                                                                                                                                                     |
| 23   | 156668                      | miR-20           | CACTTTA    | 2.116     | 2.01E-12 | 84                                  | 40                 | 4.810   | 4.60E-30  | 43     | 9                                   | miR-20a:miR-106b                                                                                                                                                                     |
| 23   | 297690                      | miR-20 or miR-17 | GCACCTT    | 1.815     | 4.51E-09 | 94                                  | 52                 | 3.806   | 1.22E-30  | 64     | 17                                  | miR-17:miR-292-3p:miR-291b-3p:miR-295:miR-294:miR-20b:miR-20a:miR-93:miR-106a:miR-106b:miR-290-3p:miR-291a-3p                                                                        |
| 23   | 157636                      | miR-20           | ACTTTA     | 1.332     | 2.41E-05 | 215                                 | 161                | 2.897   | 3.92E-26  | 90     | 31                                  | miR-20a:miR-142-5p:miR-106b                                                                                                                                                          |
| 23   | 306438                      | miR-20 or miR-17 | GCACCTT    | 1.306     | 7.00E-05 | 221                                 | 169                | 2.784   | 3.44E-30  | 114    | 41                                  | miR-17:miR-292-3p:miR-291b-3p:miR-295:miR-294:miR-467b:miR-467c:miR-20b:miR-20a:miR-93:miR-105:miR-302b:miR-302c:miR-302a:miR-302d:miR-467d:miR-106a:miR-106b:miR-290-3p:miR-291a-3p |
| 23   | 297690                      | miR-20 or miR-17 | CACTTT     | 1.233     | 6.16E-04 | 267                                 | 217                | 2.834   | 3.62E-35  | 129    | 46                                  | miR-17:miR-292-3p:miR-291b-3p:miR-295:miR-294:miR-20b:miR-20a:miR-93:miR-106a:miR-106b:miR-290-3p:miR-291a-3p                                                                        |
| 23   | miR-20                      | with all 6mers   |            | 1.285     | 2.75E-11 | 703                                 | 547                | 2.833   | 6.58E-88  | 333    | 118                                 |                                                                                                                                                                                      |
| 24   | 127192                      | miR-136          | AATGGAGT   | 1.228     | 3.96E-01 | 17                                  | 14                 | 2.290   | 5.67E-02  | 5      | 2                                   | miR-136                                                                                                                                                                              |
| 24   | 127946                      | miR-136          | ATGGAGT    | 0.803     | 1.29E-01 | 48                                  | 60                 | 0.991   | 9.72E-01  | 15     | 15                                  | miR-880:miR-136                                                                                                                                                                      |
| 24   | 127192                      | miR-136          | AATGGAG    | 0.880     | 2.90E-01 | 69                                  | 78                 | 1.341   | 1.58E-01  | 23     | 17                                  | miR-136                                                                                                                                                                              |
| 24   | 128805                      | miR-136          | TGGAGT     | 0.690     | 2.26E-07 | 193                                 | 280                | 0.851   | 2.11E-01  | 60     | 71                                  | miR-880:miR-136:miR-509-5p                                                                                                                                                           |
| 24   | 127946                      | miR-136          | ATGGAG     | 0.685     | 2.34E-09 | 247                                 | 360                | 0.851   | 1.08E-01  | 99     | 116                                 | miR-880:miR-136                                                                                                                                                                      |
| 24   | 127192                      | miR-136          | AATGGA     | 1.127     | 3.96E-02 | 297                                 | 264                | 1.679   | 3.52E-09  | 127    | 76                                  | miR-136                                                                                                                                                                              |
| 24   | miR-136                     | with all 6mers   |            | 0.816     | 3.03E-08 | 737                                 | 904                | 1.090   | 1.46E-01  | 286    | 262                                 |                                                                                                                                                                                      |
| 25   | 82032                       | miR-204          | AAAGGGAA   | 0.534     | 1.35E-02 | 15                                  | 28                 | 1.026   | 9.54E-01  | 5      | 5                                   | miR-204:miR-211                                                                                                                                                                      |
| 25   | 82032                       | miR-204          | AAAGGGA    | 0.562     | 1.53E-04 | 42                                  | 75                 | 1.659   | 3.00E-02  | 18     | 11                                  | miR-204:miR-211                                                                                                                                                                      |
| 25   | 82032                       | miR-204          | AAGGGAA    | 0.683     | 3.73E-03 | 57                                  | 84                 | 1.204   | 4.72E-01  | 15     | 12                                  | miR-204:miR-211                                                                                                                                                                      |
| 25   | 109152                      | miR-204          | AAGGGA     | 0.664     | 1.47E-07 | 163                                 | 245                | 1.387   | 2.03E-02  | 50     | 36                                  | miR-204:miR-343:miR-211:miR-188-5p                                                                                                                                                   |
| 25   | 82032                       | miR-204          | AGGGAA     | 0.807     | 1.31E-03 | 224                                 | 278                | 1.923   | 5.22E-09  | 77     | 40                                  | miR-204:miR-211                                                                                                                                                                      |
| 25   | 82032                       | miR-204          | AAAGGG     | 0.610     | 9.55E-09 | 132                                 | 216                | 1.395   | 2.84E-02  | 43     | 31                                  | miR-204:miR-211                                                                                                                                                                      |
| 25   | miR-204                     | with all 6mers   |            | 0.702     | 5.43E-16 | 519                                 | 739                | 1.590   | 1.07E-09  | 170    | 107                                 |                                                                                                                                                                                      |
| 26   | 87290                       | miR-340          | CTTTATAA   | 1.778     | 4.26E-03 | 24                                  | 13                 | 2.914   | 3.01E-03  | 7      | 2                                   | miR-340-5p                                                                                                                                                                           |
| 26   | 87290                       | miR-340          | CTTTATA    | 1.358     | 2.16E-02 | 56                                  | 41                 | 2.903   | 3.08E-07  | 21     | 7                                   | miR-340-5p                                                                                                                                                                           |
| 26   | 87290                       | miR-340          | TTTATAA    | 1.191     | 1.03E-01 | 87                                  | 73                 | 1.765   | 4.61E-04  | 37     | 21                                  | miR-340-5p                                                                                                                                                                           |
| 26   | 88258                       | miR-340          | CTTTAT     | 1.329     | 7.51E-06 | 246                                 | 185                | 2.673   | 9.79E-23  | 92     | 34                                  | miR-340-5p:miR-142-5p                                                                                                                                                                |
| 26   | 87290                       | miR-340          | TTATAA     | 1.184     | 1.93E-02 | 192                                 | 162                | 1.999   | 1.21E-09  | 74     | 37                                  | miR-340-5p                                                                                                                                                                           |
| 26   | 87290                       | miR-340          | TTTATA     | 1.100     | 1.29E-01 | 252                                 | 229                | 1.889   | 1.36E-13  | 131    | 69                                  | miR-340-5p:miR-466l                                                                                                                                                                  |
| 26   | miR-340                     | with all 6mers   |            | 1.197     | 2.18E-06 | 690                                 | 576                | 2.109   | 1.41E-39  | 297    | 141                                 |                                                                                                                                                                                      |
| 27   | 82568                       | miR-31           | TCTTGCC    | 1.838     | 3.11E-04 | 34                                  | 18                 | 4.579   | 2.24E-06  | 8      | 2                                   | miR-31                                                                                                                                                                               |
| 27   | 82568                       | miR-31           | TCTTGCC    | 1.202     | 1.51E-01 | 61                                  | 51                 | 3.179   | 4.63E-08  | 20     | 6                                   | miR-31                                                                                                                                                                               |
| 27   | 82568                       | miR-31           | CTTGCC     | 1.506     | 2.00E-05 | 107                                 | 71                 | 3.075   | 1.39E-08  | 23     | 7                                   | miR-31                                                                                                                                                                               |
| 27   | 82568                       | miR-31           | TTGCC      | 2.030     | 6.53E-56 | 475                                 | 234                | 4.430   | 2.72E-108 | 184    | 42                                  | miR-31                                                                                                                                                                               |
| 27   | 82568                       | miR-31           | TCTTGC     | 1.177     | 2.06E-02 | 202                                 | 172                | 2.550   | 5.12E-15  | 65     | 25                                  | miR-31                                                                                                                                                                               |
| 27   | 82568                       | miR-31           | CTTGCC     | 1.129     | 6.19E-02 | 236                                 | 209                | 2.481   | 8.89E-15  | 68     | 27                                  | miR-31                                                                                                                                                                               |
| 27   | miR-31                      | with all 6mers   |            | 1.485     | 2.42E-33 | 913                                 | 615                | 3.357   | 4.30E-116 | 317    | 94                                  |                                                                                                                                                                                      |
| 28   | 78086                       | miR-324-3p       | GGCAGTGG   | 0.202     | 2.58E-06 | 7                                   | 35                 | 0.416   | 2.01E-01  | 2      | 5                                   | miR-324-3p                                                                                                                                                                           |
| 28   | 78086                       | miR-324-3p       | GGCAGTG    | 0.373     | 1.36E-10 | 39                                  | 105                | 0.897   | 6.85E-01  | 14     | 16                                  | miR-324-3p                                                                                                                                                                           |
| 28   | 78086                       | miR-324-3p       | GCAGTGG    | 0.392     | 2.93E-10 | 42                                  | 107                | 0.455   | 1.54E-02  | 9      | 20                                  | miR-324-3p                                                                                                                                                                           |
| 28   | 78086                       | miR-324-3p       | GCAGTG     | 0.618     | 1.33E-12 | 213                                 | 345                | 1.048   | 6.96E-01  | 69     | 66                                  | miR-324-3p                                                                                                                                                                           |
| 28   | 78086                       | miR-324-3p       | CAGTGG     | 0.673     | 1.16E-10 | 262                                 | 389                | 1.040   | 7.06E-01  | 91     | 87                                  | miR-324-3p                                                                                                                                                                           |
| 28   | 78086                       | miR-324-3p       | GGCAGT     | 0.535     | 1.67E-12 | 123                                 | 230                | 1.005   | 9.75E-01  | 38     | 38                                  | miR-324-3p                                                                                                                                                                           |
| 28   | miR-324-3p                  | with all 6mers   |            | 0.620     | 4.73E-32 | 598                                 | 964                | 1.036   | 6.18E-01  | 198    | 191                                 |                                                                                                                                                                                      |
| 29   | 74880                       | miR-23           | AATGTGAT   | 1.541     | 2.94E-02 | 25                                  | 16                 | 2.516   | 6.87E-03  | 8      | 3                                   | miR-23b:miR-23a                                                                                                                                                                      |
| 29   | 74880                       | miR-23           | AATGTGA    | 1.667     | 5.02E-09 | 128                                 | 77                 | 3.300   | 4.12E-24  | 64     | 19                                  | miR-23b:miR-23a                                                                                                                                                                      |
| 29   | 74880                       | miR-23           | ATGTGAT    | 1.106     | 4.35E-01 | 60                                  | 54                 | 1.440   | 1.55E-01  | 15     | 10                                  | miR-23b:miR-23a                                                                                                                                                                      |
| 29   | 75593                       | miR-23           | TGTGAT     | 1.284     | 1.76E-05 | 293                                 | 228                | 2.240   | 6.30E-19  | 115    | 51                                  | miR-23b:miR-23a:miR-377                                                                                                                                                              |
| 29   | 75148                       | miR-23           | AATGTG     | 1.571     | 1.85E-20 | 414                                 | 264                | 2.873   | 1.62E-46  | 168    | 58                                  | miR-323-3p:miR-23b:miR-23a                                                                                                                                                           |
| 29   | 74880                       | miR-23           | ATGTGA     | 1.380     | 4.61E-09 | 329                                 | 238                | 2.482   | 1.27E-27  | 134    | 54                                  | miR-23b:miR-23a                                                                                                                                                                      |
| 29   | miR-23                      | with all 6mers   |            | 1.419     | 1.06E-29 | 1036                                | 730                | 2.546   | 4.05E-87  | 417    | 164                                 |                                                                                                                                                                                      |
| 30   | 65491                       | miR-217          | ATGCAGTA   | 1.324     | 2.93E-01 | 14                                  | 11                 | 2.648   | 1.31E-02  | 6      | 2                                   | miR-217                                                                                                                                                                              |
| 30   | 65491                       | miR-217          | TGCAGTA    | 1.140     | 3.40E-01 | 53                                  | 46                 | 1.827   | 7.66E-03  | 19     | 10                                  | miR-217                                                                                                                                                                              |
| 30   | 65491                       | miR-217          | ATGCAGT    | 1.024     | 8.54E-01 | 60                                  | 59                 | 1.452   | 9.33E-02  | 20     | 14                                  | miR-217                                                                                                                                                                              |
| 30   | 66220                       | miR-217          | TGCAGT     | 0.890     | 6.56E-02 | 247                                 | 278                | 1.407   | 1.29E-03  | 88     | 63                                  | miR-883a-3p:miR-883b-3p:miR-217                                                                                                                                                      |
| 30   | 65491                       | miR-217          | GCAGTA     | 0.962     | 6.42E-01 | 141                                 | 147                | 1.911   | 3.35E-07  | 60     | 31                                  | miR-217                                                                                                                                                                              |
| 30   | 65491                       | miR-217          | ATGCAG     | 0.865     | 2.08E-02 | 252                                 | 291                | 1.085   | 4.29E-01  | 95     | 88                                  | miR-217                                                                                                                                                                              |
| 30   | miR-217                     | with all 6mers   |            | 0.894     | 4.62E-03 | 640                                 | 716                | 1.338   | 5.10E-06  | 243    | 182                                 |                                                                                                                                                                                      |

**Supplemental Figure 1**

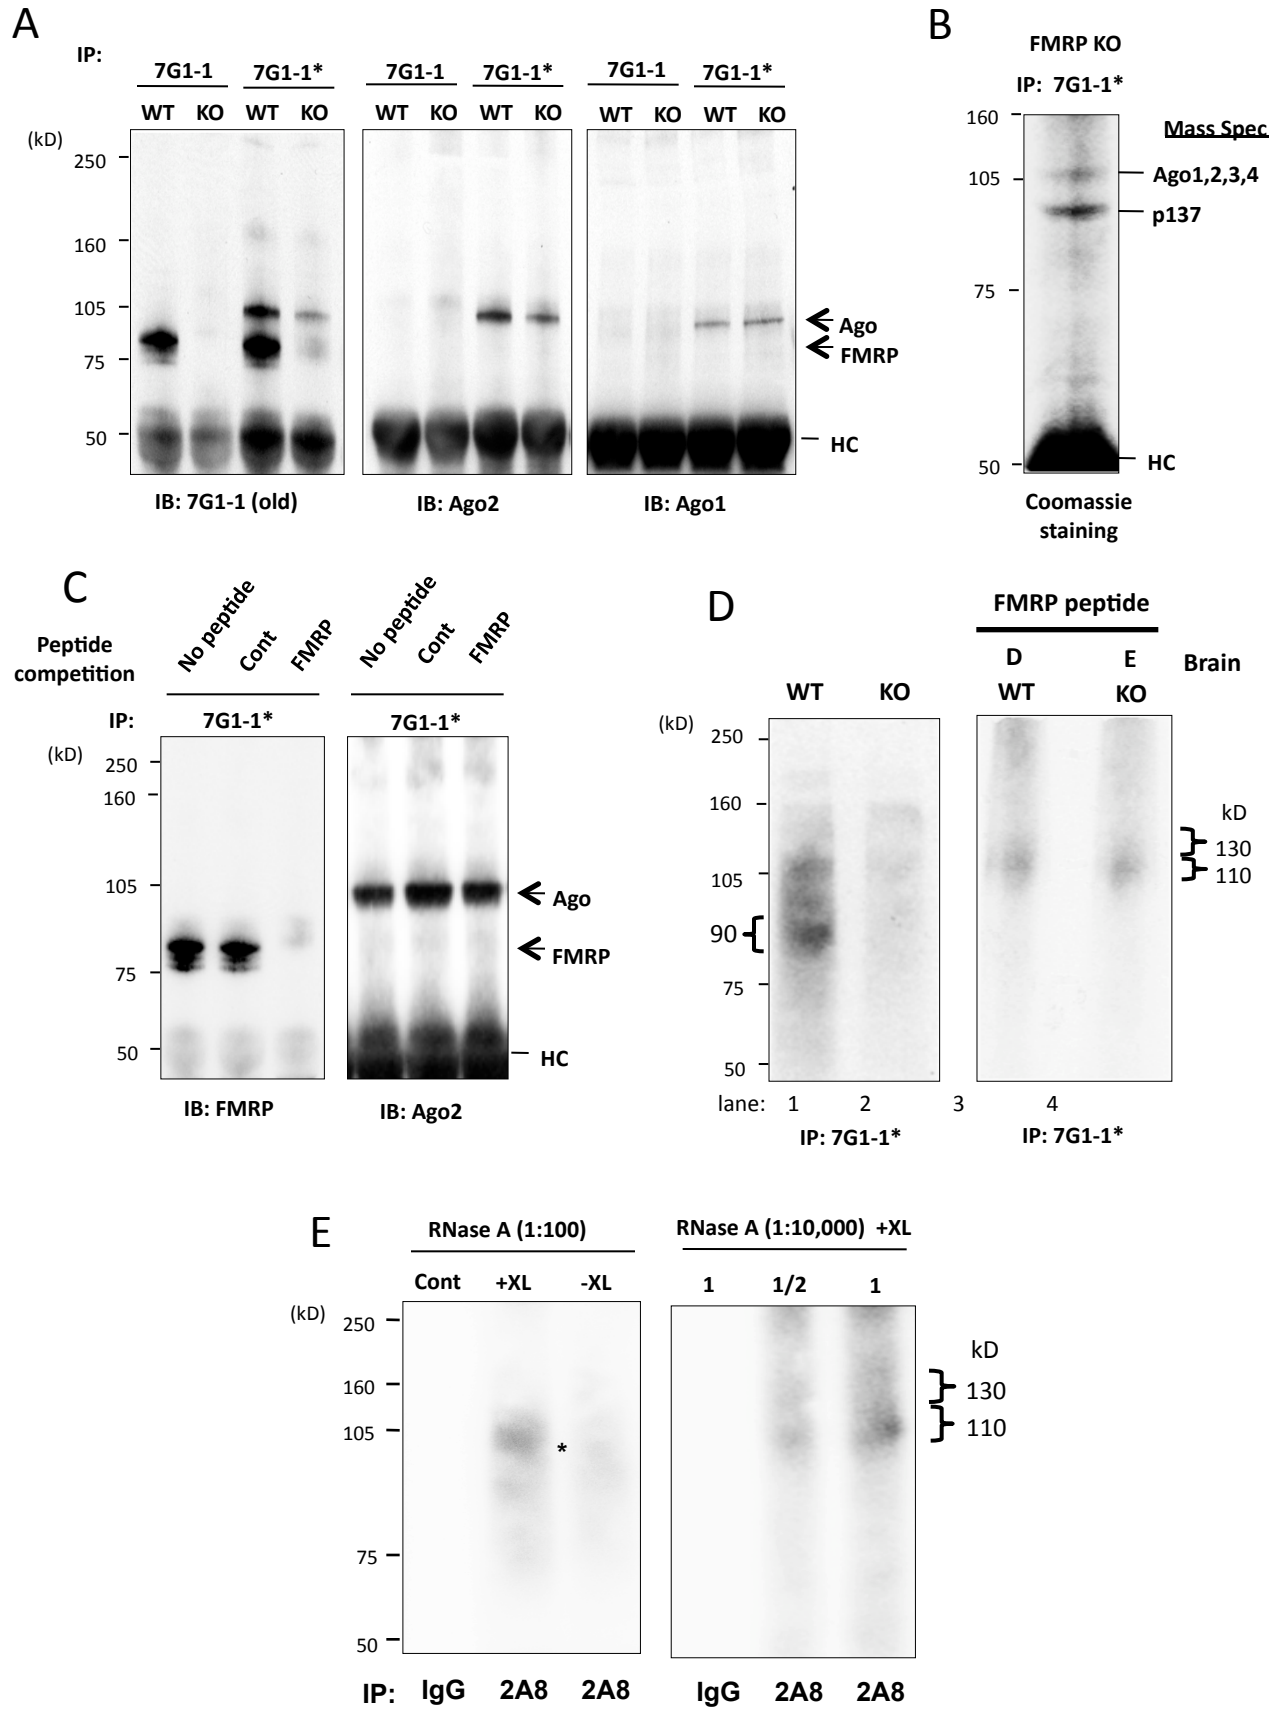

## Supplemental Figure 2

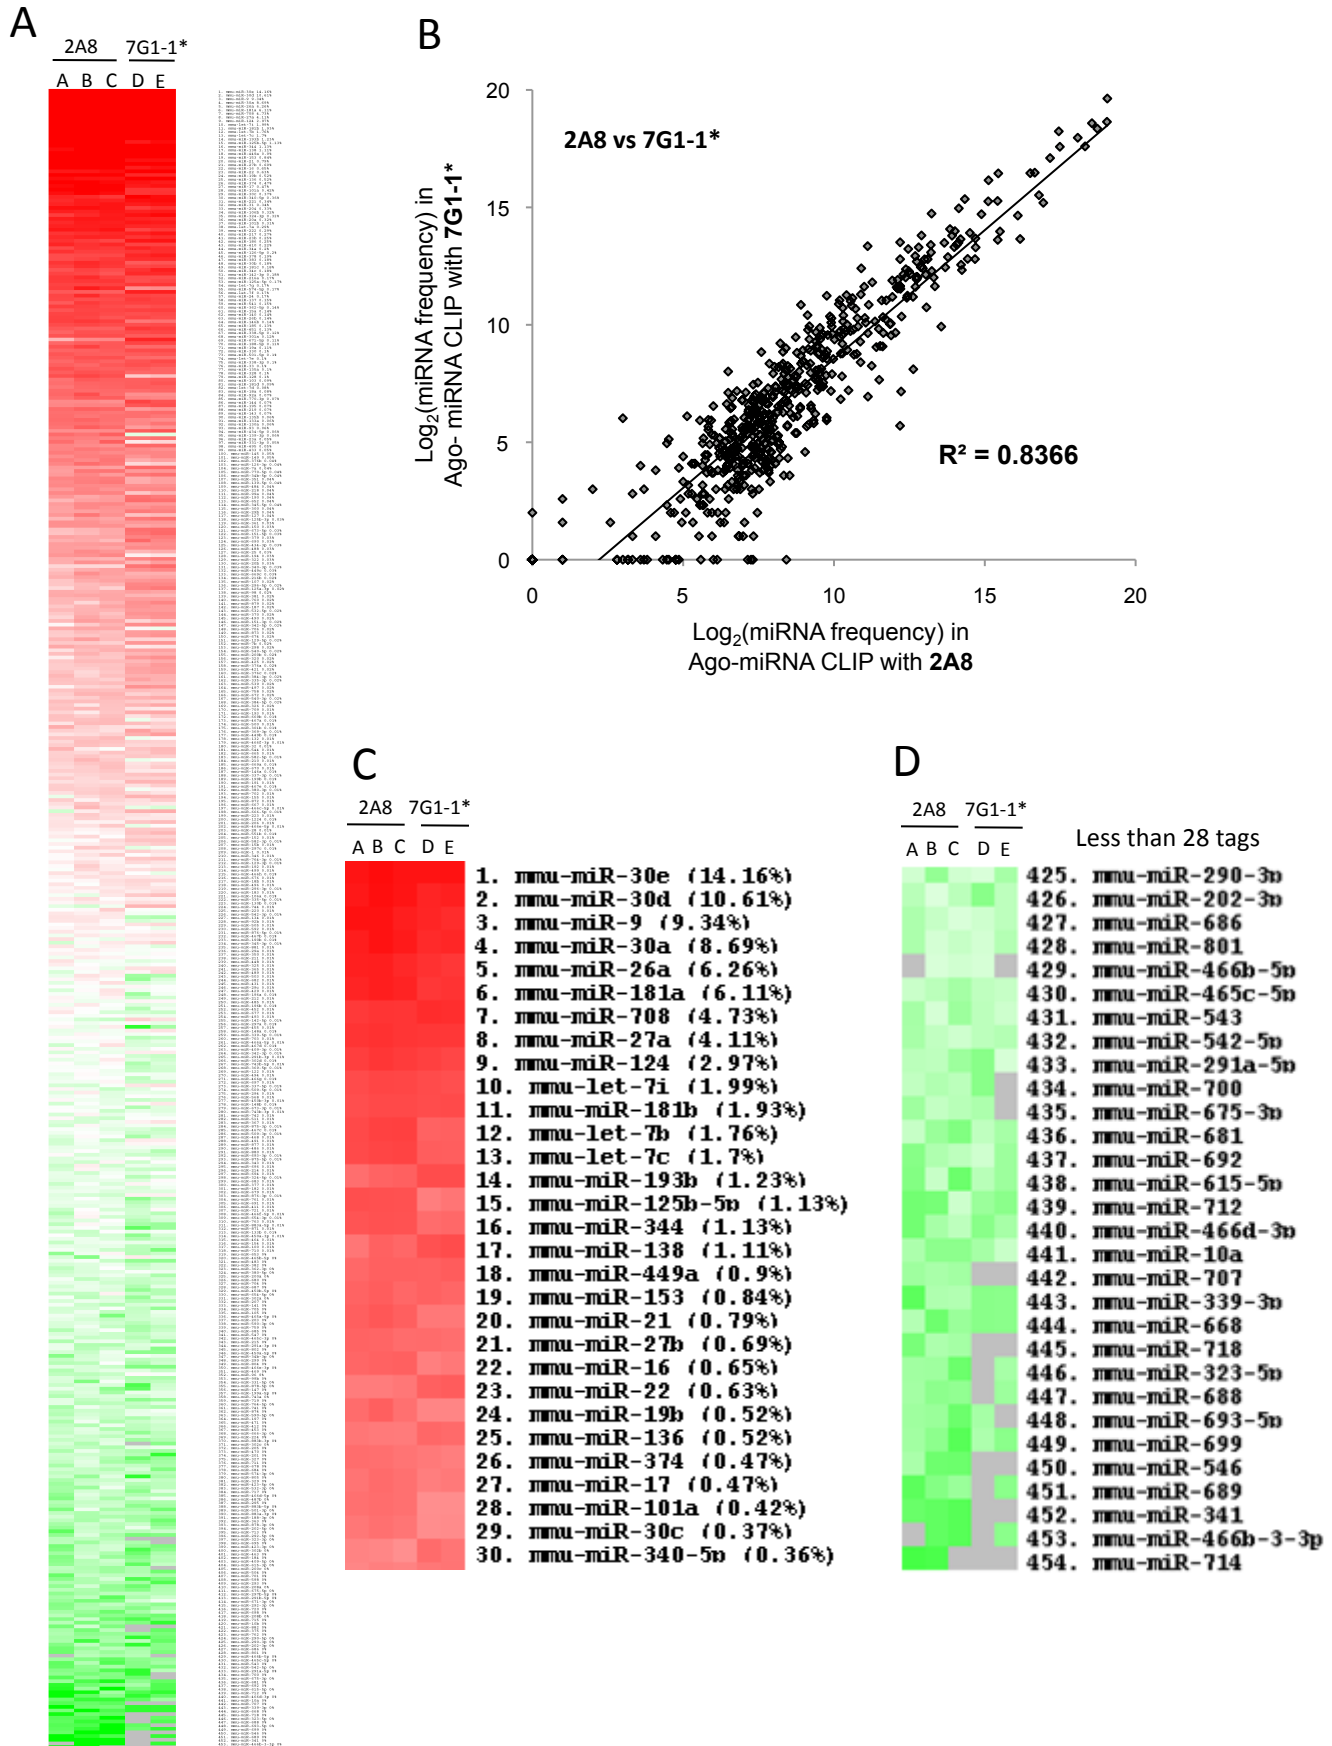

Supplemental Figure 3

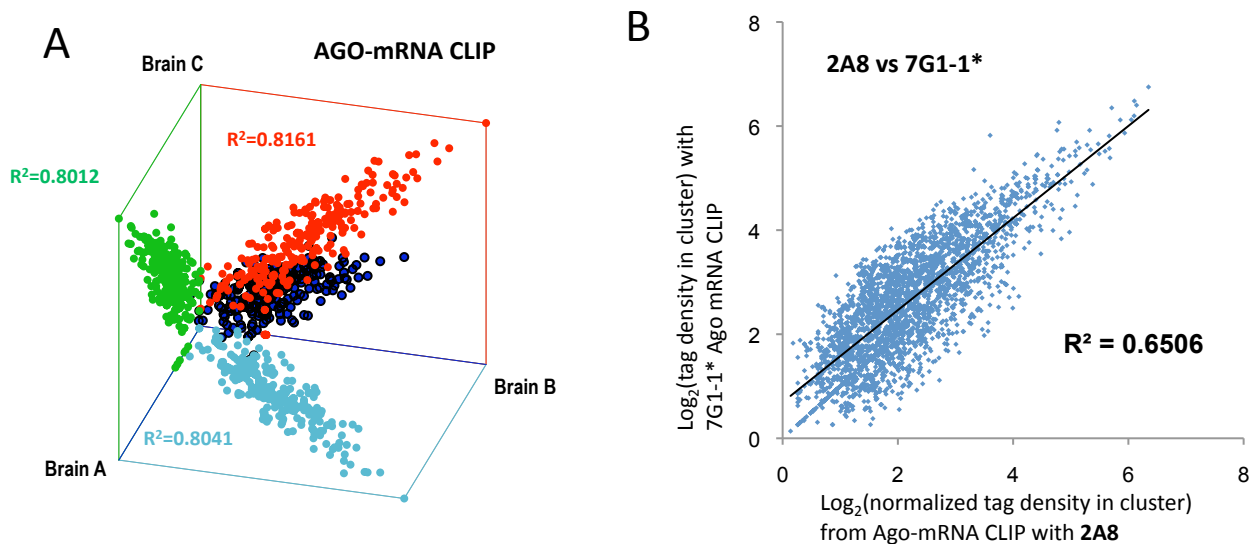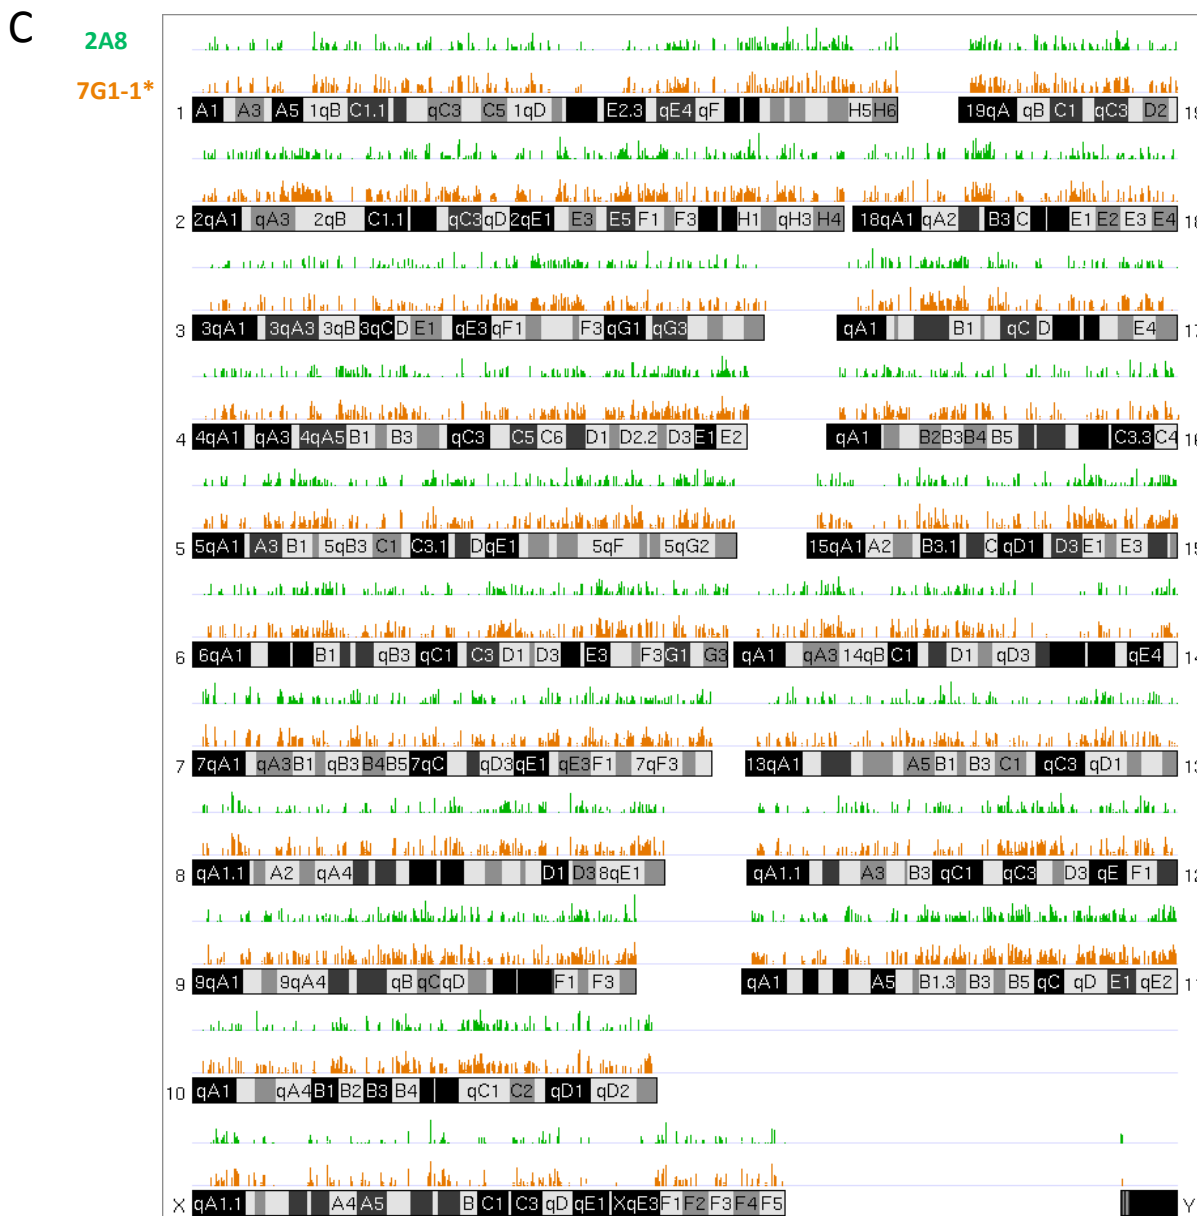



Supplemental Figure 4

A *in silico* random CLIP

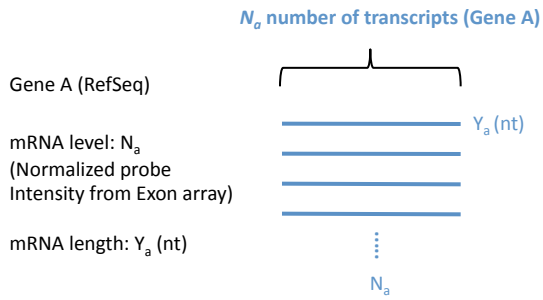

Total Unique tags from real CLIP experiments : Z

|        | Exon Array (N) | Length (Y) | Estimated Fragment number ( $F_n$ ) | Expected tag number ( $T_n$ )    |
|--------|----------------|------------|-------------------------------------|----------------------------------|
| Gene A | $N_a$          | $Y_a$      | $N_a \times (Y_a / 50)$             | $(F_a / \text{Tot}(F)) \times Z$ |
| Gene B | $N_b$          | $Y_b$      | $N_b \times (Y_b / 50)$             | $(F_b / \text{Tot}(F)) \times Z$ |
| Gene C | $N_c$          | $Y_c$      | $N_c \times (Y_c / 50)$             | $(F_c / \text{Tot}(F)) \times Z$ |
| Gene D | $N_d$          | $Y_d$      | $N_d \times (Y_d / 50)$             | $(F_d / \text{Tot}(F)) \times Z$ |
| ⋮      | ⋮              | ⋮          | ⋮                                   | ⋮                                |

Total Fragments number ( $\text{Tot}(F) = F_a + \dots + F_z$ )

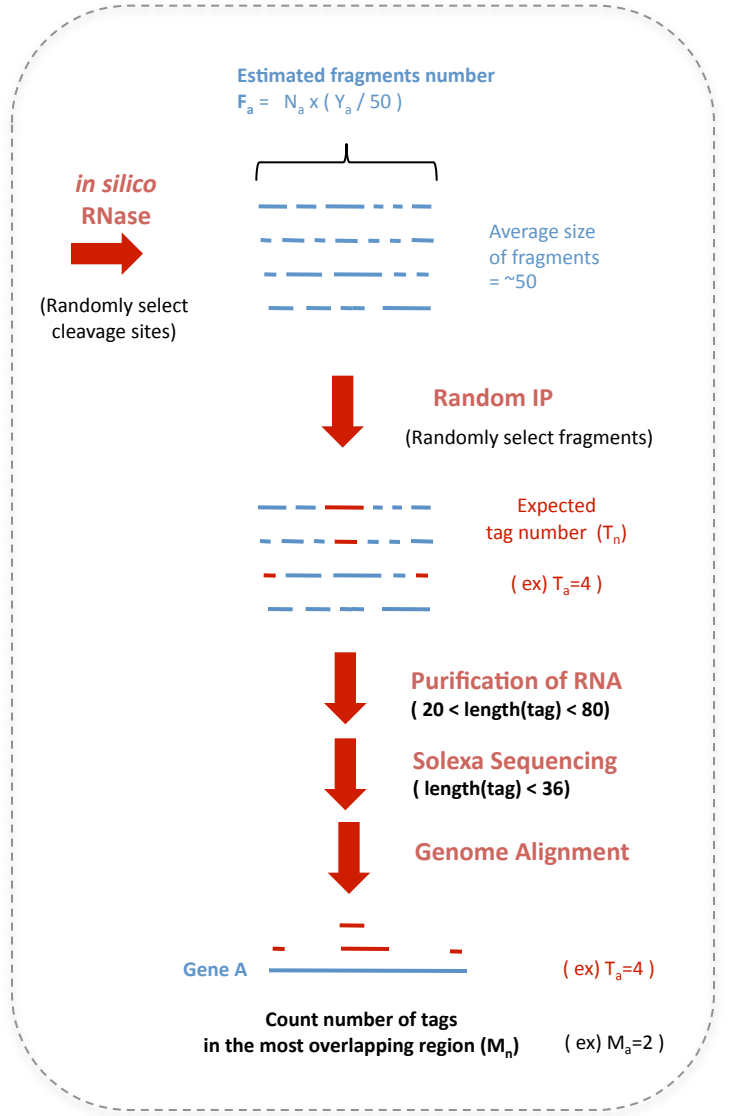

Repeat simulation 500 times

Estimate false discovery rate (P-value)

( Example )

|                                               |             |            |            |
|-----------------------------------------------|-------------|------------|------------|
| Number of tags in the most overlapping region | 3           | 2          | 1          |
| Number of observations in 500 trial           | 1           | 5          | 494        |
| Threshold for normalization                   | >3          | >2         | >1         |
| P-value                                       | $P < 0.002$ | $P < 0.01$ | $P < 0.99$ |

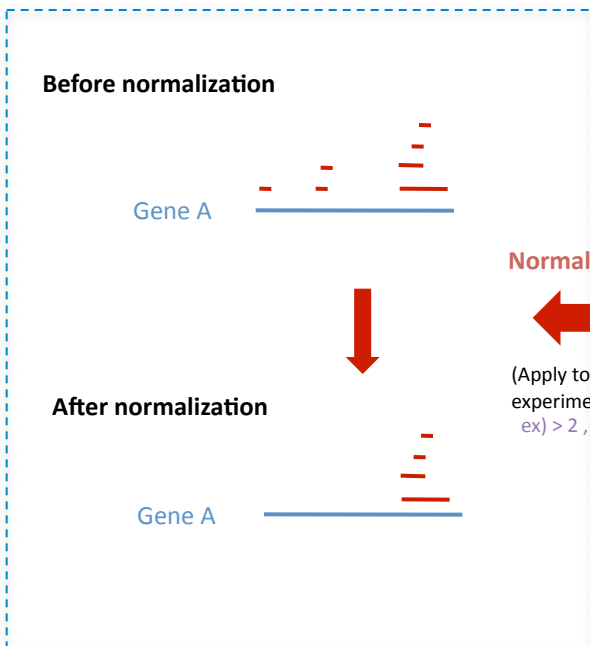

Supplemental Figure 4

B

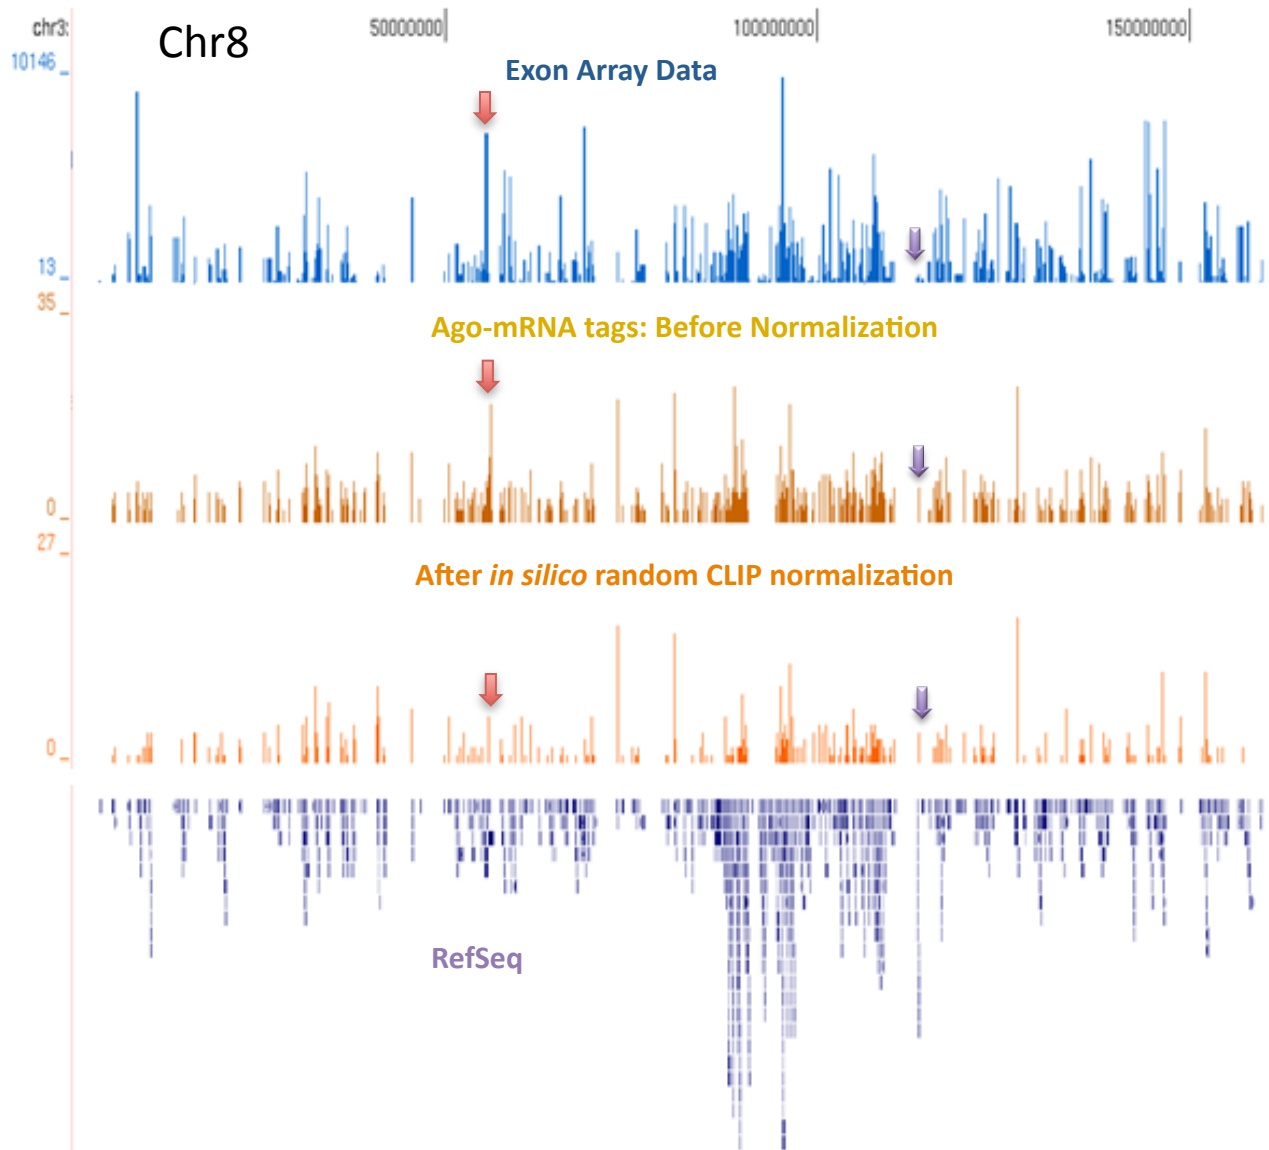

Supplemental Figure 4

C

| Chad7<br>(NM 001081417) | (N <sub>n</sub> ) Exon array<br>value | Length<br>(Y <sub>n</sub> ) | Expected number of tags<br>(T <sub>n</sub> ) |
|-------------------------|---------------------------------------|-----------------------------|----------------------------------------------|
| 1x                      | 100                                   | 9444                        | 5                                            |
| 2x                      | 200                                   | 9444                        | 5                                            |
| 4x                      | 400                                   | 9444                        | 5                                            |
| 8x                      | 800                                   | 9444                        | 5                                            |
| 16x                     | 1600                                  | 9444                        | 5                                            |
| 32x                     | 3200                                  | 9444                        | 5                                            |
| 72x                     | 7200                                  | 9444                        | 5                                            |
| 100x                    | 10000                                 | 9444                        | 5                                            |
| 500x                    | 50000                                 | 9444                        | 5                                            |

Number of tags in the most  
overlapping region (M<sub>n</sub>)

| Simulation | 3 | 2  | 1   |
|------------|---|----|-----|
| 1x         | 0 | 12 | 488 |
| 2x         | 0 | 52 | 448 |
| 4x         | 0 | 21 | 479 |
| 8x         | 0 | 57 | 443 |
| 16x        | 0 | 43 | 457 |
| 32x        | 0 | 20 | 480 |
| 72x        | 0 | 41 | 459 |
| 100x       | 0 | 61 | 439 |
| 500x       | 0 | 35 | 465 |

False discovery rate base on  
*in silico* CLIP simulation result

| Simulation | 3      | 2     | 1     |
|------------|--------|-------|-------|
| 1x         | <0.002 | 0.024 | 0.976 |
| 2x         | <0.002 | 0.104 | 0.896 |
| 4x         | <0.002 | 0.042 | 0.958 |
| 8x         | <0.002 | 0.114 | 0.886 |
| 16x        | <0.002 | 0.086 | 0.914 |
| 32x        | <0.002 | 0.04  | 0.96  |
| 72x        | <0.002 | 0.082 | 0.918 |
| 100x       | <0.002 | 0.122 | 0.878 |
| 500x       | <0.002 | 0.07  | 0.93  |

Supplemental Figure 5

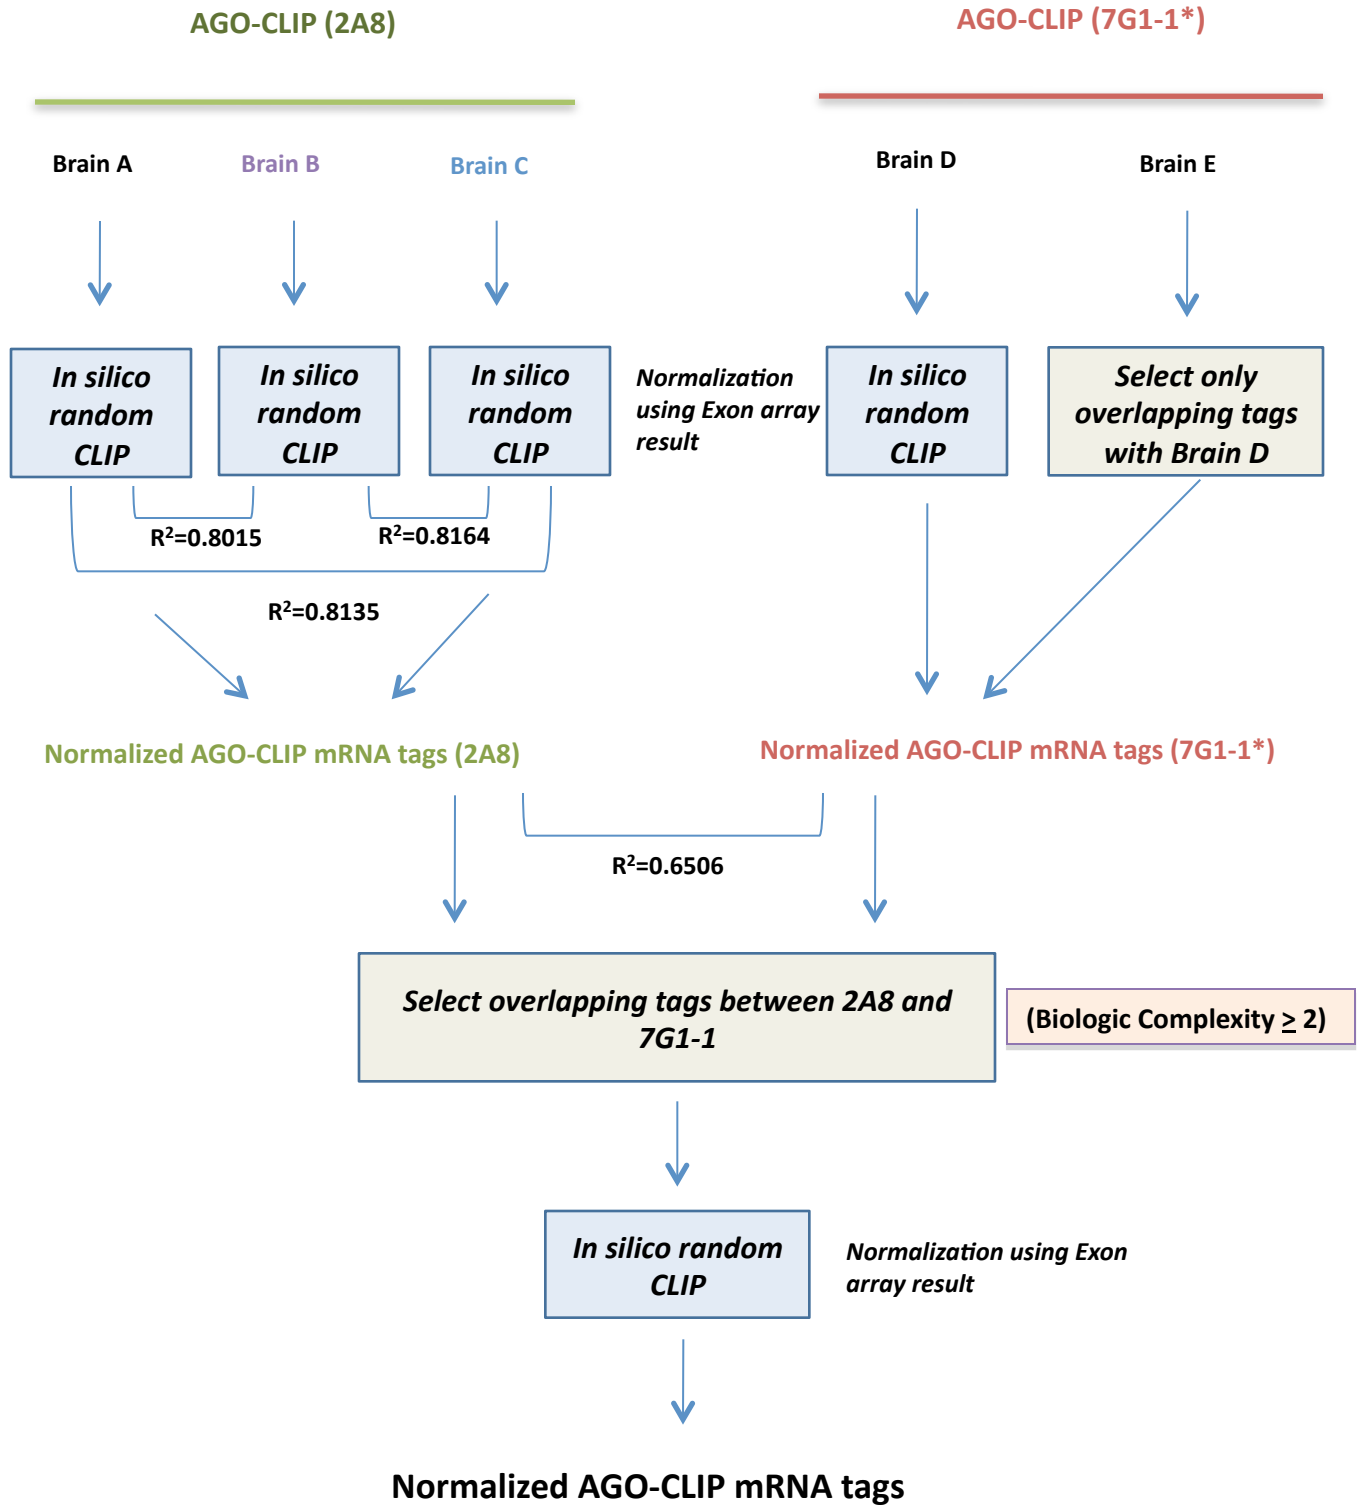

## Supplemental Figure 6

A

Landgraf et al

AGO miRNA CLIP

| miRNA           | TOTAL CLONES NODE | Total clones in AGO-miRNA-CLIP | Rank in AGO-miRNA CLIP |
|-----------------|-------------------|--------------------------------|------------------------|
| mmu-miR-124     | 740               | 735430                         | 9                      |
| mmu-miR-9       | 547               | 2309955                        | 3                      |
| mmu-miR-126-3p  | 131               | 10238                          | 103                    |
| mmu-miR-16      | 105               | 160843                         | 22                     |
| mmu-miR-140     | 96                | 34537                          | 62                     |
| mmu-miR-125b-5p | 91                | 278206                         | 15                     |
| mmu-miR-27a     | 84                | 1017631                        | 8                      |
| mmu-miR-30e     | 82.5              | 3504225                        | 1                      |
| mmu-miR-136     | 75                | 127192                         | 25                     |
| mmu-miR-143     | 71                | 15878                          | 89                     |
| mmu-miR-872     | 64                | 2224                           | 195                    |
| mmu-miR-30a     | 60                | 2150543                        | 4                      |
| mmu-miR-30d     | 47.5              | 2624768                        | 2                      |
| mmu-miR-15a     | 41                | 35050                          | 61                     |
| mmu-miR-379     | 39                | 7411                           | 123                    |
| mmu-let-7c      | 35                | 419429                         | 13                     |
| mmu-miR-29b     | 32                | 8154                           | 116                    |
| mmu-miR-24      | 32                | 41024                          | 57                     |
| mmu-miR-22      | 32                | 154156                         | 23                     |
| mmu-miR-130a    | 28                | 14884                          | 92                     |

B

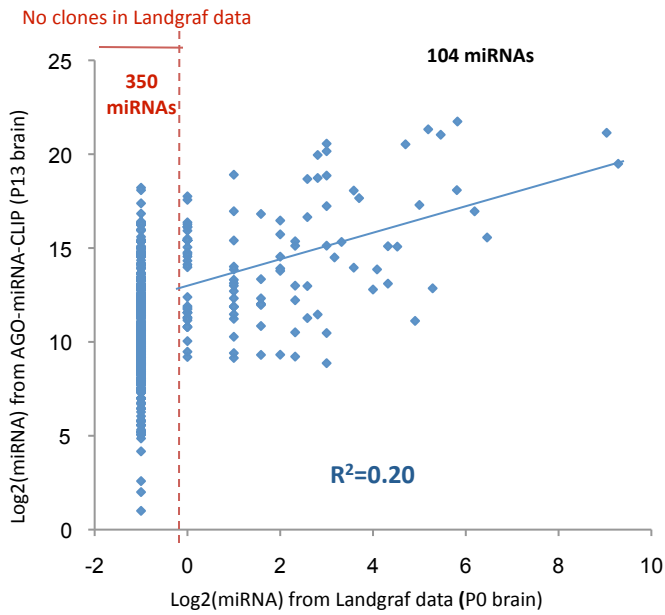

C

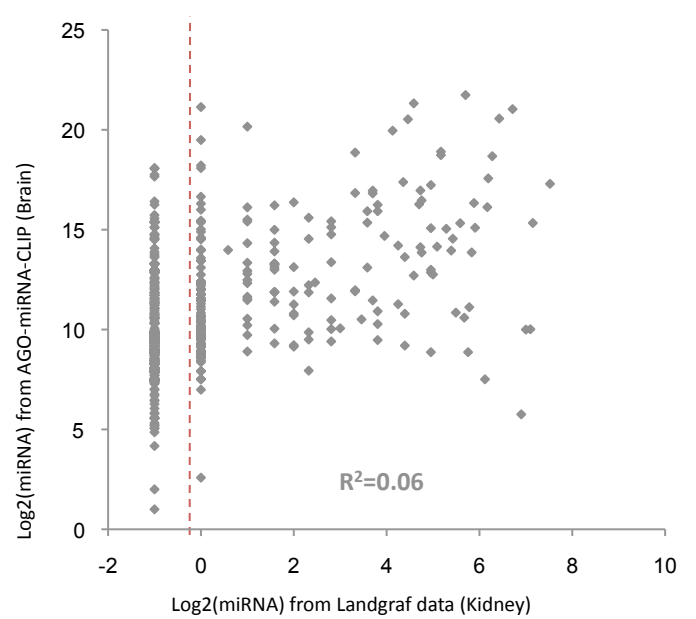

Supplemental Figure 6

D

| miRNA       | Lu et al         | AGO miRNA CLIP                 |                        |
|-------------|------------------|--------------------------------|------------------------|
|             | Expression level | Total clones in AGO-miRNA CLIP | Rank in AGO-miRNA CLIP |
| miR-338-5p  | 4913             | 28123                          | 67                     |
| miR-124     | 4425             | 735430                         | 9                      |
| let-7c      | 4229             | 419429                         | 13                     |
| miR-181a    | 4054             | 1510285                        | 6                      |
| let-7a      | 4009             | 71661                          | 38                     |
| let-7b      | 3824             | 435438                         | 12                     |
| miR-125b-5p | 3767             | 278206                         | 15                     |
| miR-29b     | 3701             | 8154                           | 116                    |
| miR-29c     | 3455             | 1045                           | 246                    |
| miR-29a     | 3439             | 1238                           | 236                    |
| miR-219     | 3403             | 15966                          | 88                     |
| miR-9       | 3339             | 2309955                        | 3                      |
| miR-125a-5p | 3148             | 42068                          | 53                     |
| miR-128     | 2993             | 23182                          | 79                     |
| miR-320     | 2353             | 3830                           | 156                    |
| miR-26a     | 2262             | 1547706                        | 5                      |
| miR-181c    | 2217             | 43566                          | 49                     |
| miR-30a     | 2190             | 2150543                        | 4                      |
| miR-24      | 2005             | 41024                          | 57                     |
| miR-181b    | 1958             | 475794                         | 11                     |
| let-7f      | 1949             | 41306                          | 56                     |
| miR-16      | 1897             | 160843                         | 22                     |
| miR-30d     | 1882             | 2624768                        | 2                      |
| miR-137     | 1874             | 35776                          | 58                     |
| miR-27b     | 1803             | 170907                         | 21                     |
| miR-27a     | 1733             | 1017631                        | 8                      |

E

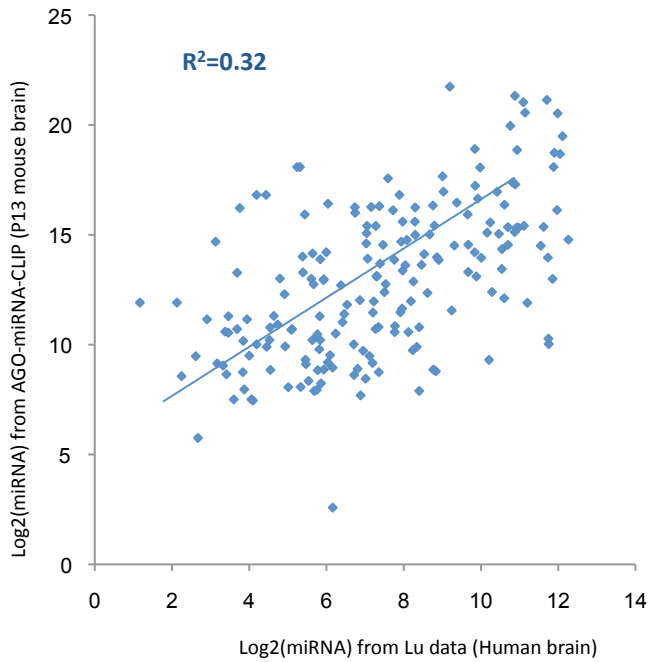

F

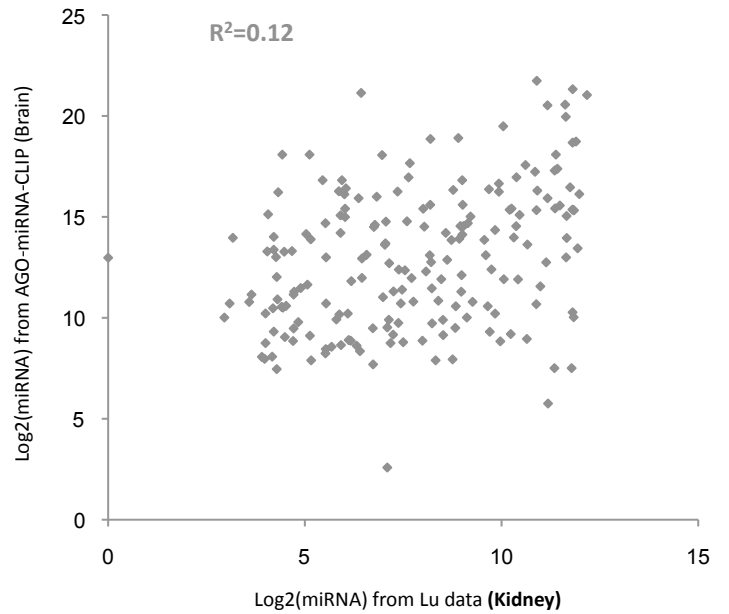

# Supplemental Figure 7

**A** Number of Ago-mRNA clusters

| Cutoff<br>(peak height) | Biological Complexity |      |      |       |
|-------------------------|-----------------------|------|------|-------|
|                         | 5                     | >=4  | >=3  | >=2   |
| Total                   | 1463                  | 4335 | 8775 | 11118 |
| >=5                     | 1448                  | 4036 | 6521 | 6710  |
| >=10                    | 990                   | 1844 | 2172 | 2173  |
| >=15                    | 587                   | 878  | 959  | 959   |
| >=20                    | 336                   | 456  | 479  | 479   |
| >=25                    | 223                   | 265  | 272  | 272   |
| >=30                    | 134                   | 151  | 151  | 151   |
| >=35                    | 94                    | 102  | 102  | 102   |
| >=40                    | 60                    | 63   | 63   | 63    |
| >=45                    | 31                    | 32   | 32   | 32    |
| >=50                    | 20                    | 20   | 20   | 20    |

**B**

| complexity        | >=5  | >=4  | >=3  | >=2   |
|-------------------|------|------|------|-------|
| Number of cluster | 1463 | 4335 | 8775 | 11118 |
| Number of genes   | 829  | 2081 | 3563 | 4280  |
| Clusters / genes  | 1.77 | 2.08 | 2.46 | 2.60  |

**P13 brain expressed gene: 10743 genes**  
(DABG :  $p < 0.05$  , Value > 100 )

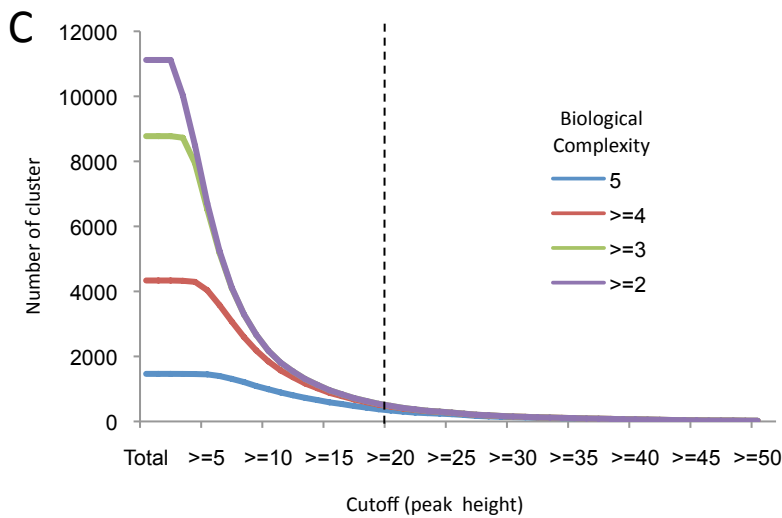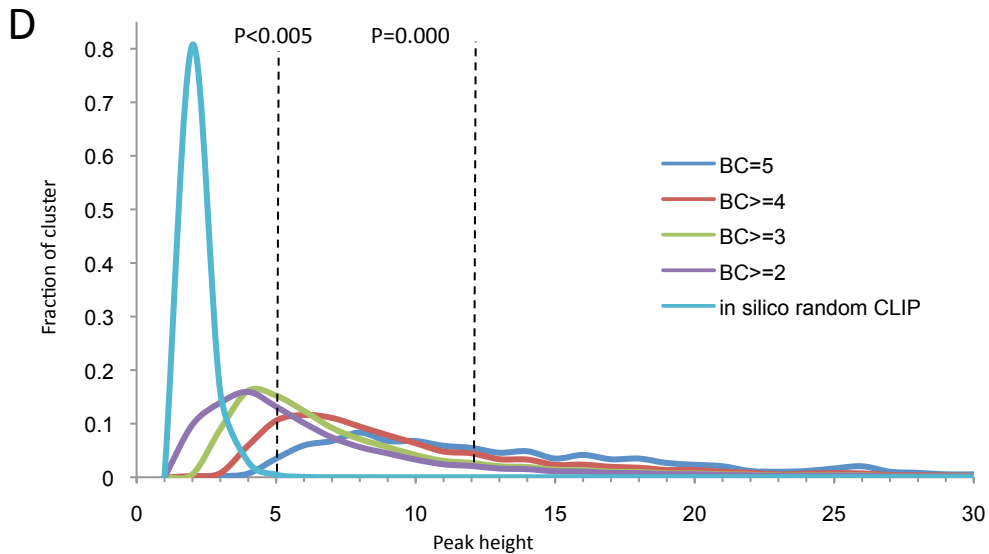

Supplemental Figure 7

E

|                          | BC  | Obs/Exp   | p-value    | True positive rate(%) | Obs  | Exp      |
|--------------------------|-----|-----------|------------|-----------------------|------|----------|
| <b>miR-124<br/>6mers</b> | >=2 | 3.2649573 | 0.00 x 100 | 76.5439348            | 2292 | 702.3587 |
|                          | >=3 | 3.7799929 | 0.00 x 100 | 79.07946684           | 2032 | 537.5671 |
|                          | >=4 | 4.071868  | 0.00 x 100 | 80.28339873           | 1180 | 289.7933 |
|                          | =5  | 5.0520888 | 0.00 x 100 | 83.47677917           | 453  | 89.66588 |

|                          | peak | Obs/Exp   | p-value          | True positive Rate(%) | Obs  | Exp      |
|--------------------------|------|-----------|------------------|-----------------------|------|----------|
| <b>miR-124<br/>6mers</b> | >=2  | 3.2649573 | 0.00 x 100       | 76.55310621           | 2292 | 702      |
|                          | >=10 | 5.3136153 | 0.00 x 100       | 84.16121417           | 832  | 156.5789 |
|                          | >=20 | 6.4373708 | 1.32 x<br>10-290 | 86.55438834           | 289  | 44.8941  |
|                          | >=30 | 6.6297288 | 1.08 x<br>10-124 | 86.89337425           | 118  | 17.79862 |
|                          | >=40 | 5.5610835 | 1.4E-42          | 84.7586149            | 50   | 8.991054 |
|                          | >=50 | 5.0924938 | 2.68E-15         | 83.58636006           | 19   | 3.730981 |

|                         | BC  | Obs/Exp   | p-value  | True positive rate (%) | Obs | Exp      |
|-------------------------|-----|-----------|----------|------------------------|-----|----------|
| <b>miR-19<br/>6mers</b> | >=2 | 1.1714286 | 1.69E-05 | 53.94736842            | 738 | 630      |
|                         | >=3 | 1.2227305 | 9.95E-07 | 55.01029036            | 590 | 482.5266 |
|                         | >=4 | 1.1302395 | 0.035681 | 53.05692112            | 294 | 260.1219 |
|                         | =5  | 1.428835  | 0.000119 | 58.82799722            | 115 | 80.48515 |

|                         | peak | Obs/Exp   | p-value  | True positive rate(%) | Obs | Exp      |
|-------------------------|------|-----------|----------|-----------------------|-----|----------|
| <b>miR-19<br/>6mers</b> | >=2  | 1.1714286 | 1.69E-05 | 53.94736842           | 738 | 630      |
|                         | >=10 | 1.1384087 | 0.100824 | 53.23625524           | 160 | 140.5471 |
|                         | >=20 | 1.0174334 | 0.91188  | 50.43206914           | 41  | 40.29748 |
|                         | >=30 | 1.0640796 | 0.797852 | 51.55225689           | 17  | 15.97625 |
|                         | >=40 | 1.2390843 | 0.497008 | 55.33888625           | 10  | 8.070476 |
|                         | >=50 | 0.597198  | 0.46104  | 37.39035571           | 2   | 3.348973 |



## Supplemental Figure 8

### A Enrichment of AGO-CLIP mRNA clustered tags in 3' UTR

|              | Number of clusters (BC $\geq 2$ ) | % Clusters | Number of tags | % tags | Total length (brain expressed transcripts) | % Total Length | Obs/Exp (number of clusters/total length) | P-value                 | Obs/Exp (number of tags/total length) | P-value            |
|--------------|-----------------------------------|------------|----------------|--------|--------------------------------------------|----------------|-------------------------------------------|-------------------------|---------------------------------------|--------------------|
| <b>5'UTR</b> | 211                               | 1.9        | 1,742          | 1.7    | 3,686,859                                  | 6.8            | 0.28                                      | $1.92 \times 10^{-87}$  | 0.25                                  | $0.00 \times 10^0$ |
| <b>CDS</b>   | 4992                              | 44.9       | 42,553         | 41.8   | 31,287,950                                 | 57.4           | 0.78                                      | $8.77 \times 10^{-68}$  | 0.73                                  | $0.00 \times 10^0$ |
| <b>3'UTR</b> | 5915                              | 53.2       | 57,589         | 56.5   | 19,571,210                                 | 35.9           | <b>1.48</b>                               | $1.26 \times 10^{-203}$ | <b>1.58</b>                           | $0.00 \times 10^0$ |
| <b>Total</b> | 11,118                            | 100        | 101,884        | 100    | 54,546,019                                 | 100            |                                           |                         |                                       |                    |

### B 11118 Clusters (biological complexity $\geq 2$ )

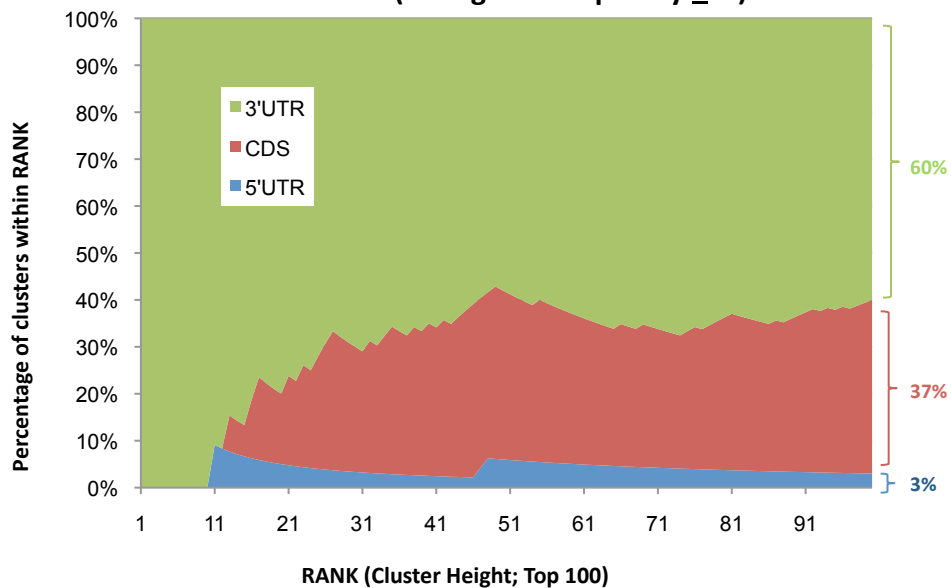

### C 1463 Clusters (biological complexity =5)

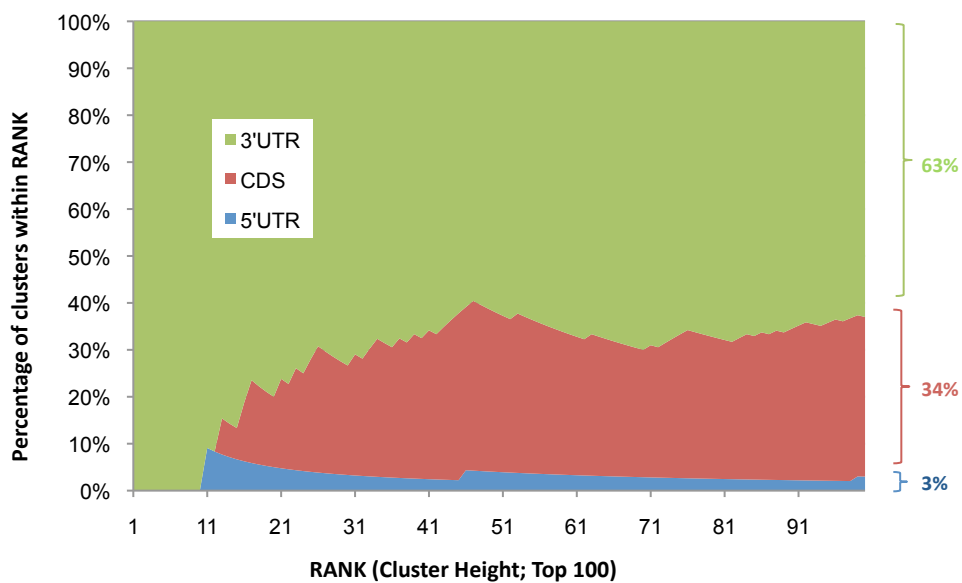

## Supplemental Figure 9

A

| Top ranking motif | AGO-mRNA CLIP          |                       |                        | AGO-miRNA CLIP |                       |                            |                        |
|-------------------|------------------------|-----------------------|------------------------|----------------|-----------------------|----------------------------|------------------------|
|                   | Regression coefficient | Number of unique tags | P-value                | miRNA          | Matched seed position | Fraction in AGO-miRNA CLIP | Rank in AGO-miRNA CLIP |
| GTGCCTT           | 0.655                  | 4581                  | $9.01 \times 10^{-31}$ | mir-124        | 2-8                   | 2.97%                      | 8                      |
| TGCCTT            | 0.421                  | 9153                  | $3.74 \times 10^{-30}$ |                | 2-7                   |                            |                        |
| GTGCCT            | 0.247                  | 6915                  | $8.45 \times 10^{-9}$  |                | 3-8                   |                            |                        |
| TACCTC            | 0.452                  | 6403                  | $2.13 \times 10^{-25}$ | let-7          | 2-7                   | 6.24%                      | 5                      |
| TACCTCA           | 0.529                  | 3558                  | $1.82 \times 10^{-18}$ |                | 2-8                   |                            |                        |
| CCAAAG            | 0.287                  | 6878                  | $9.22 \times 10^{-14}$ | mir-9          | 2-7                   | 9.33%                      | 2                      |
| CCAAAGA           | 0.376                  | 3549                  | $2.06 \times 10^{-12}$ |                | 1-7                   |                            |                        |
| TGTTTAC           | 0.404                  | 2136                  | $3.29 \times 10^{-8}$  | mir-30         | 2-8                   | 34.01%                     | 1                      |
| GTTTAC            | 0.331                  | 2964                  | $7.19 \times 10^{-8}$  |                | 2-7                   |                            |                        |
| CTGTGA            | 0.274                  | 4205                  | $1.47 \times 10^{-9}$  | mir-27         | 2-7                   | 4.80%                      | 6                      |
| ACTGTGA           | 0.394                  | 1665                  | $3.01 \times 10^{-7}$  |                | 2-8                   |                            |                        |
| TACTTGAA          | 0.676                  | 877                   | $3.89 \times 10^{-8}$  | mir-26         | 1-8                   | 6.39%                      | 4                      |
| ACTTGA            | 0.290                  | 2353                  | $3.48 \times 10^{-6}$  |                | 2-7                   |                            |                        |

BC $\geq$ 2, -24 ~ +22 region

B

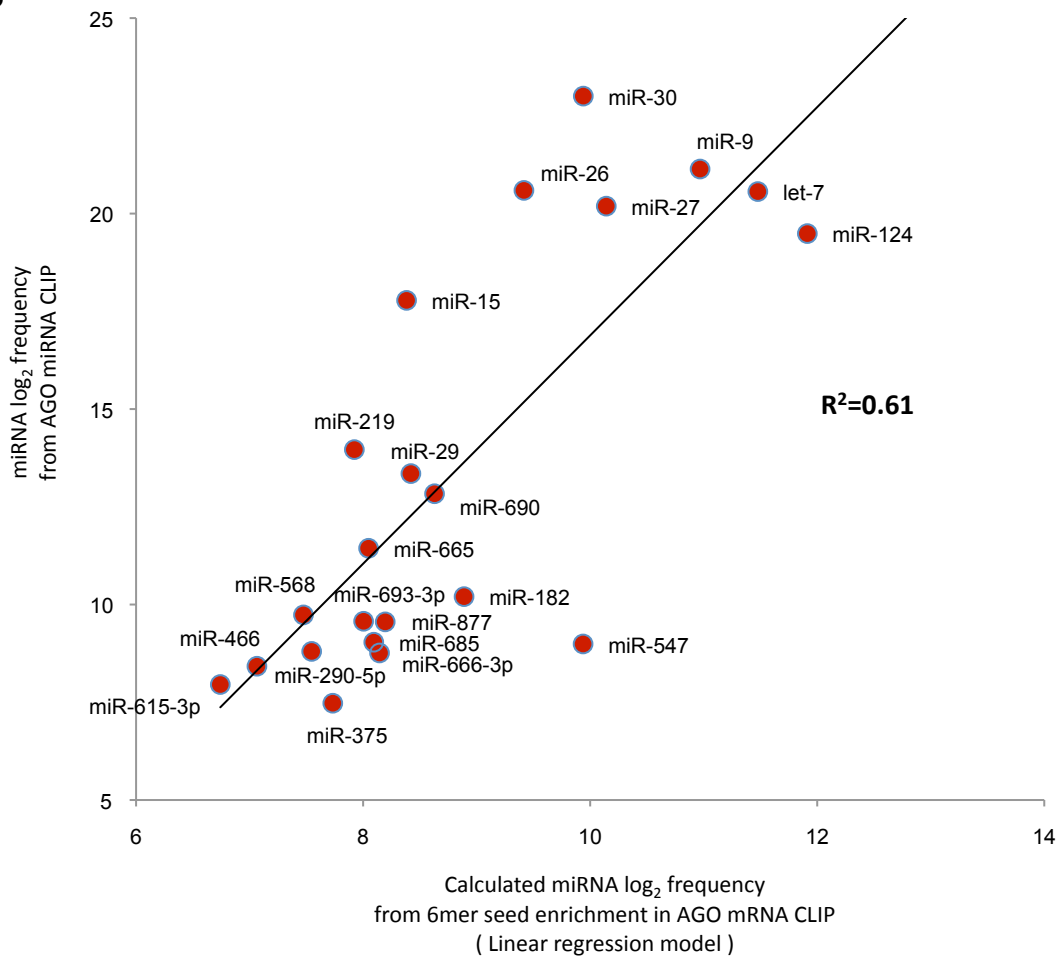

## Supplemental Figure 10

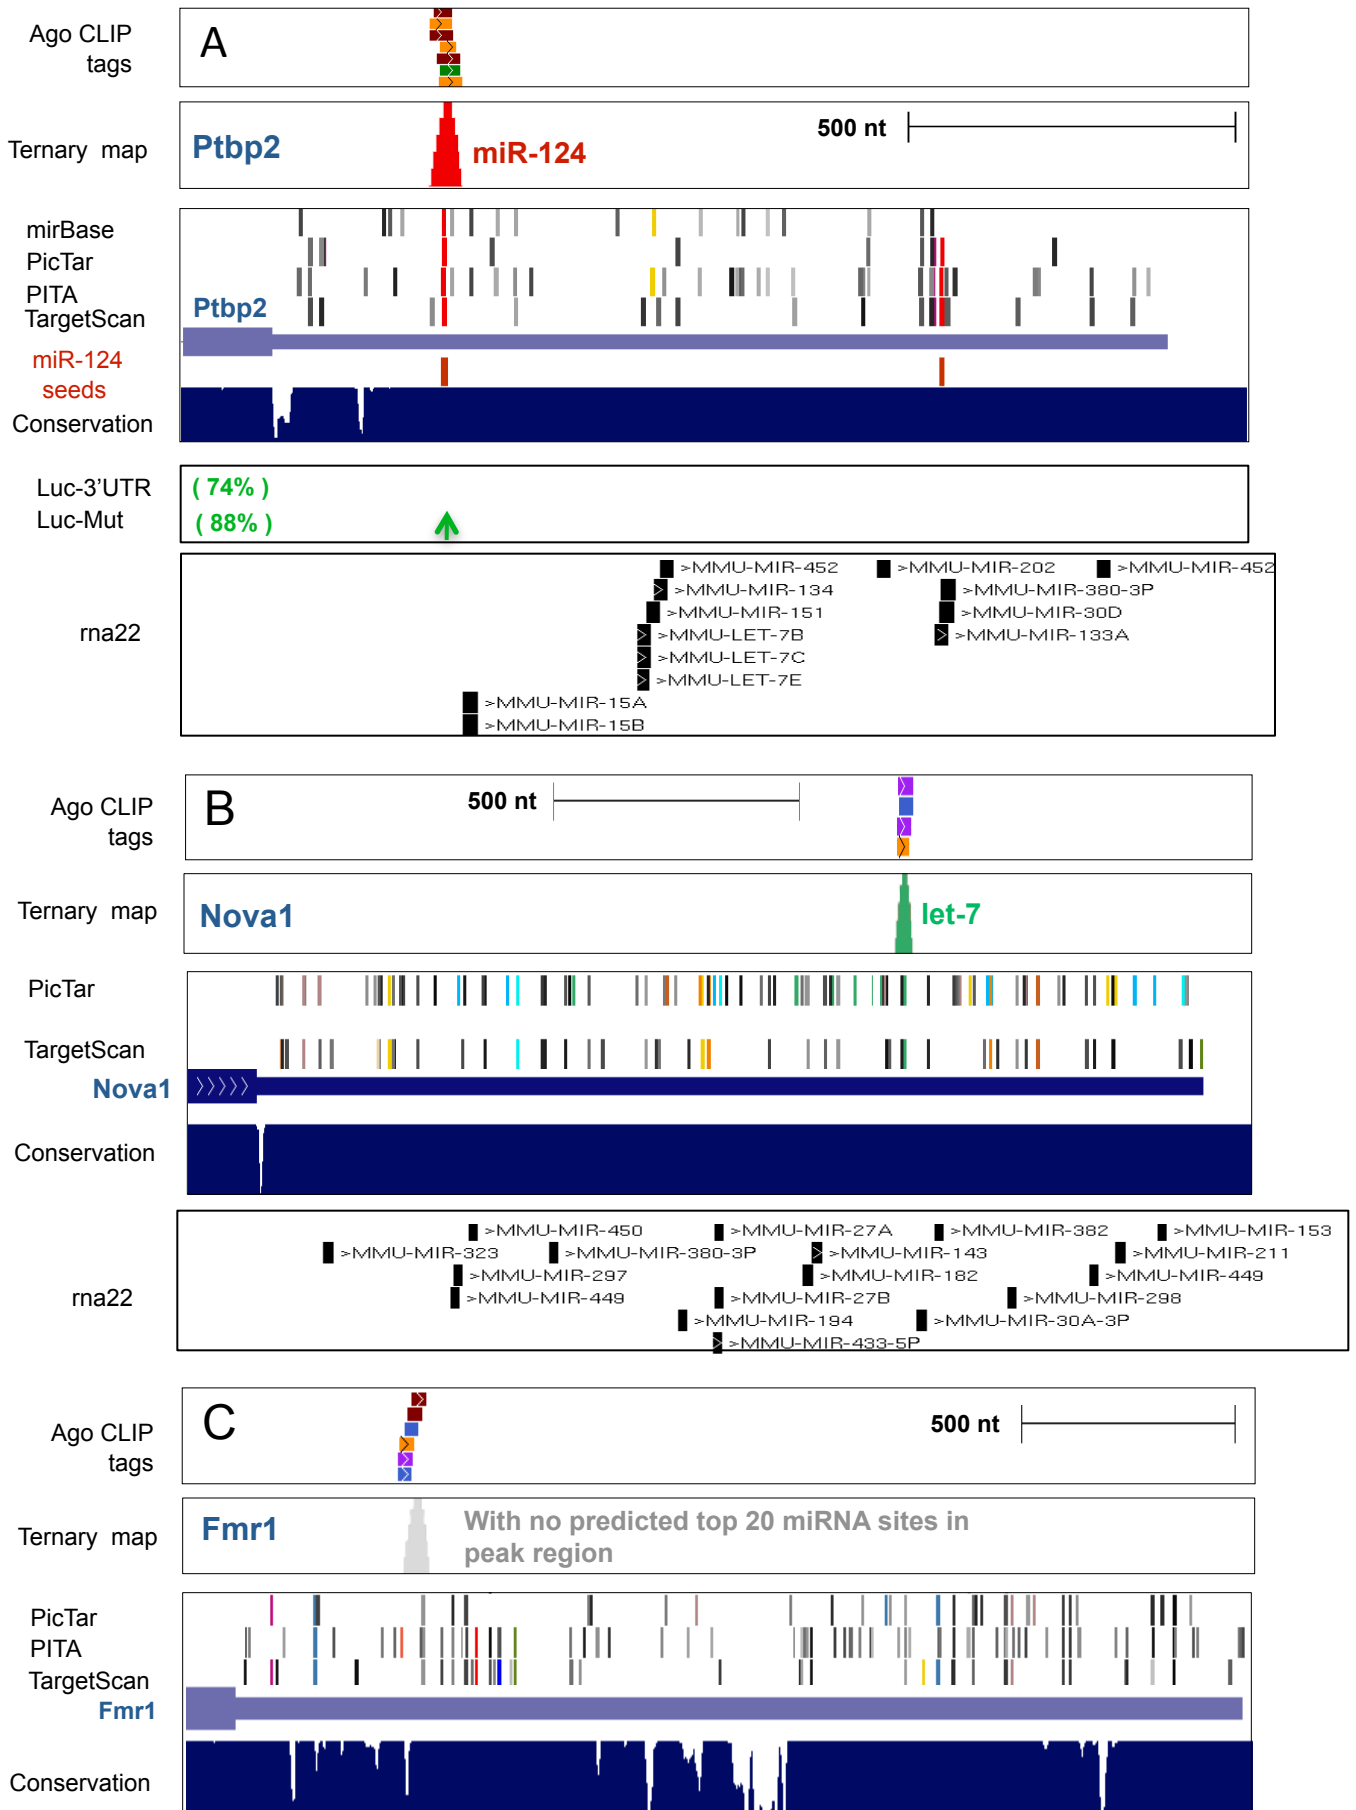

Supplemental Figure 10

**D**

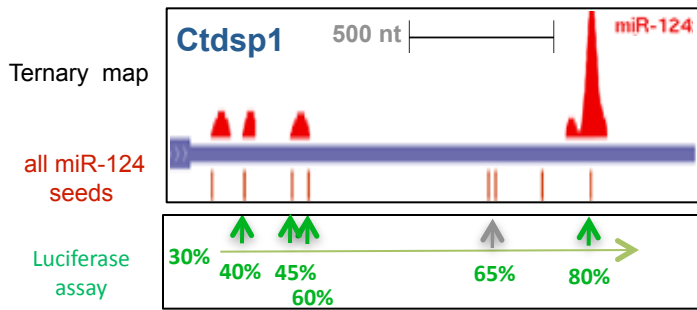

**E**

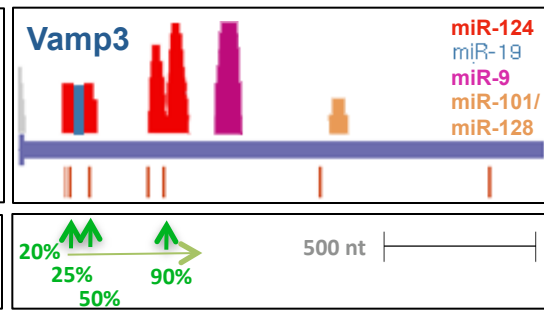

**F**

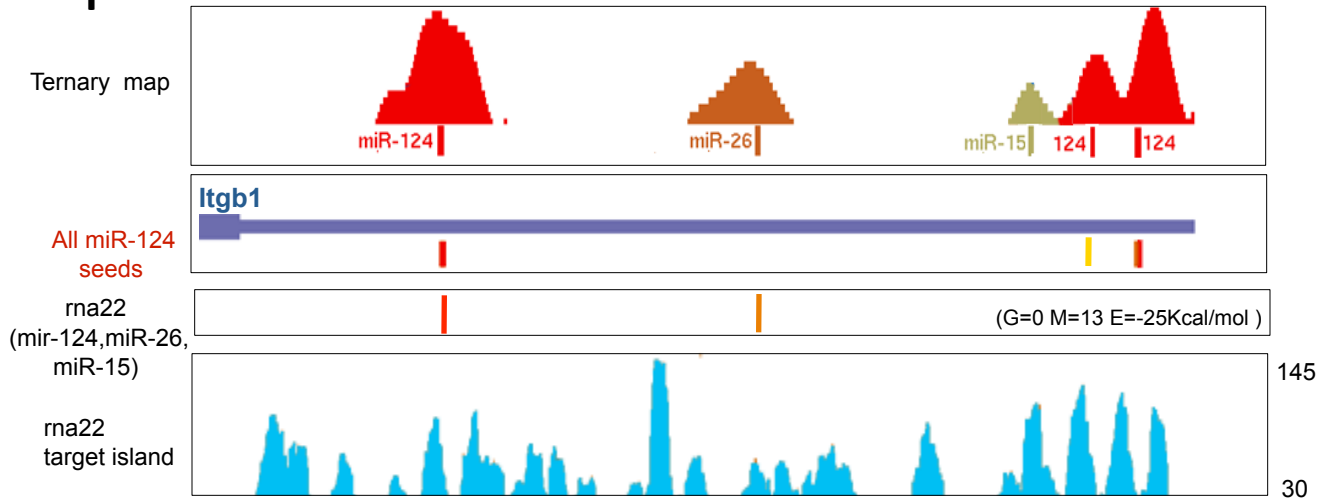

**G**

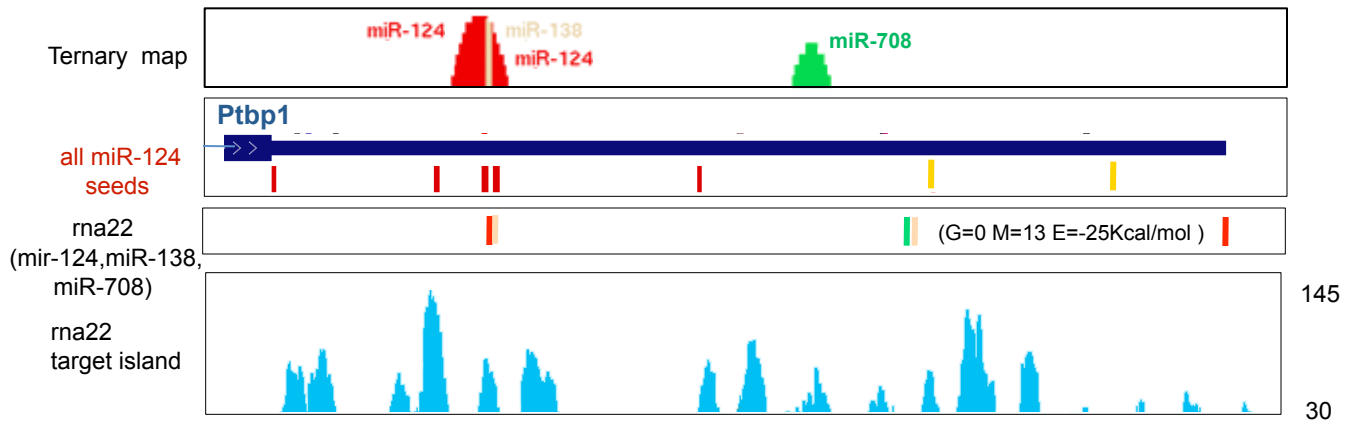

## Supplemental Figure 10

### H

Ternary map

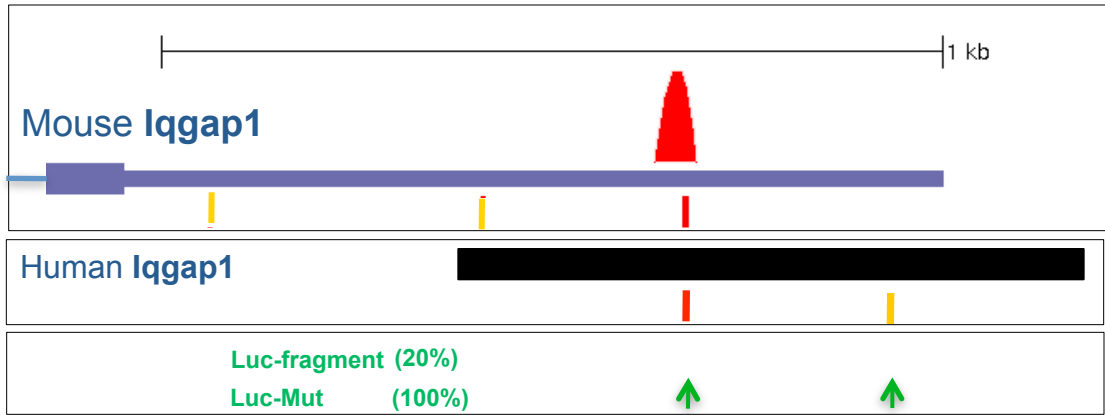

### I

Ternary map

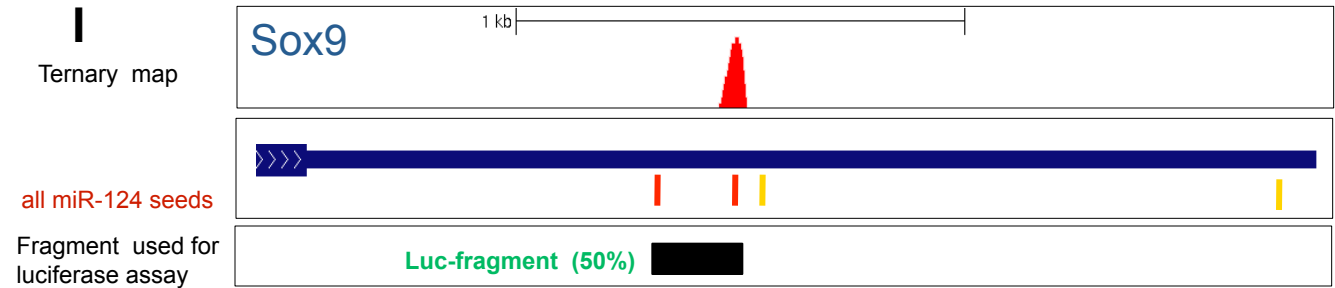

### J

all miR-9 seeds

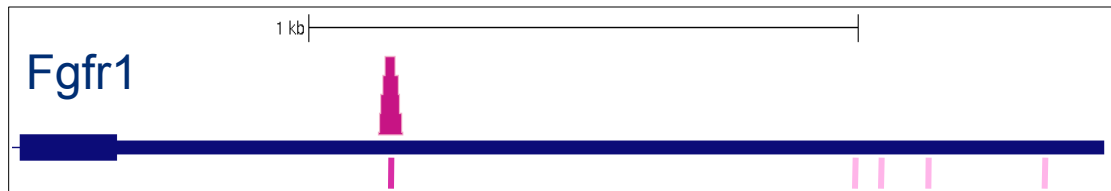

### K

Ternary map

all miR-9 seeds

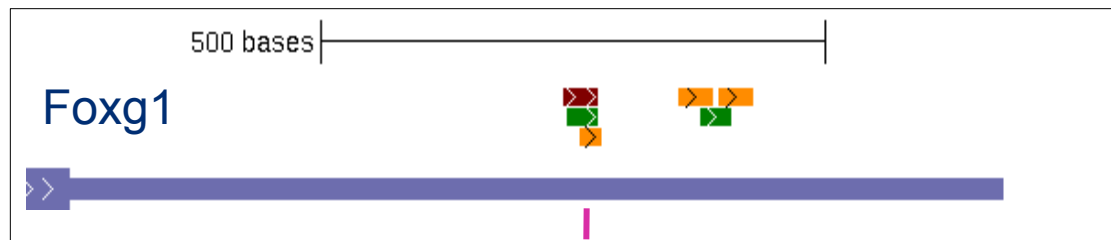

## Supplemental Figure 11

### A

| GEO      | experiments    | Cell line         | species | measure             | Reference                                                                                                                                                                                                                                                                   |
|----------|----------------|-------------------|---------|---------------------|-----------------------------------------------------------------------------------------------------------------------------------------------------------------------------------------------------------------------------------------------------------------------------|
| GSE8498  | overexpression | neuroblastoma CAD | mouse   | microarray          | Makeyev EV, Zhang J, Carrasco MA, Maniatis T. The MicroRNA miR-124 promotes neuronal differentiation by triggering brain-specific alternative pre-mRNA splicing. <i>Mol Cell</i> 2007 Aug 3;27(3):435-48.                                                                   |
| GSE6207  | overexpression | HepG2             | human   | microarray          | Wang X, Wang X. Systematic identification of microRNA functions by combining target prediction and expression profiling. <i>Nucleic Acids Res</i> 2006;34(5):1646-52                                                                                                        |
| GSE2075  | overexpression | Hela              | human   | microarray          | Lim LP, Lau NC, Garrett-Engele P, Grimson A et al. Microarray analysis shows that some microRNAs downregulate large numbers of target mRNAs. <i>Nature</i> 2005 Feb 17;433(7027):769-73                                                                                     |
| GSE11968 | overexpression | Hela              | human   | SILAC-MS microarray | Baek D, Villén J, Shin C, Camargo FD et al. The impact of microRNAs on protein output. <i>Nature</i> 2008 Sep 4;455(7209):64-71                                                                                                                                             |
| GSE11080 | overexpression | HEK293T           | human   | microarray          | David G. Hendrickson, Daniel J. Hogan, Daniel Herschlag, James E. Ferrell and Patrick O. Brown, Systematic Identification of mRNAs Recruited to Argonaute 2 by Specific microRNAs and Corresponding Changes in Transcript Abundance <i>PLoS ONE</i> , 2008 May 7;3(5):e2126 |

5 microarray (meta-analysis) : 1278 genes ( more than two exp :  $p < 0.05$ , brain expressed)

### B

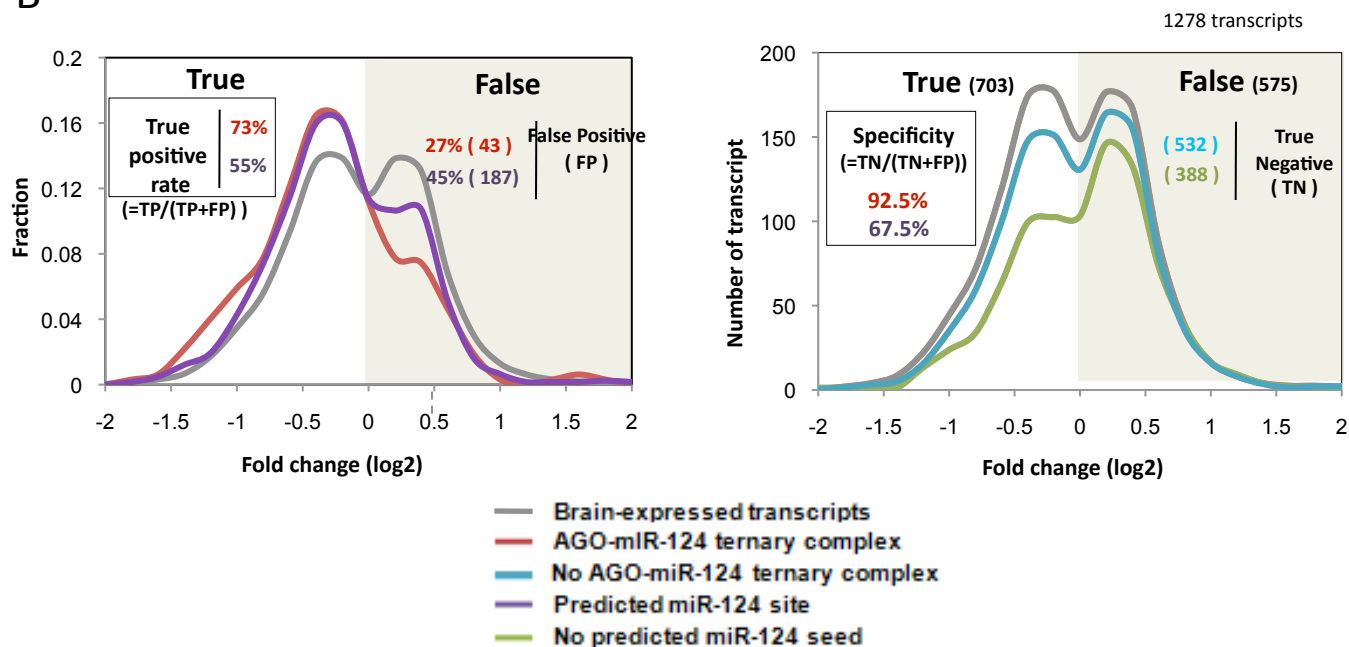

Supplemental Figure 11

C

| Gene Name | miR-124 dependent changes (log <sub>2</sub> ) |       |                                                   |                                             | Tx. level P13 Brain |
|-----------|-----------------------------------------------|-------|---------------------------------------------------|---------------------------------------------|---------------------|
|           | Micro-array                                   | SILAC | IP-micro-array <sup>1</sup> (P<10 <sup>-4</sup> ) | IP-micro-array <sup>2</sup> (<1% Local FDR) |                     |
| Itgb1     | -4.90                                         |       |                                                   |                                             | 2959                |
| Ctdsp1    | -3.60                                         |       |                                                   | 1.73                                        | 1035                |
| Cd164     | -3.40                                         |       |                                                   | 2.63                                        | 2690                |
| Plod3     | -3.20                                         | -3.48 | 1.64                                              |                                             | 694                 |
| Lamc1     | -3.15                                         |       |                                                   |                                             | 881                 |
| Sypl      | -3.05                                         |       |                                                   | 1.31                                        | 2259                |
| Hadhb     | -2.90                                         | -1.20 | 2.43                                              |                                             | absent              |
| Lass2     | -2.75                                         |       |                                                   |                                             | 3194                |
| Ptbp1     | -2.50                                         | -0.97 |                                                   |                                             | 469                 |
| C6orf72   | -2.35                                         |       |                                                   |                                             | 436                 |
| Arfp1     | -2.30                                         |       |                                                   |                                             | 101                 |
| Cebpa     | -2.20                                         |       |                                                   | 1.61                                        | 370                 |
| Epim      | -2.20                                         |       |                                                   | 1.72                                        | 544                 |
| Fcho2     | -2.15                                         |       |                                                   |                                             | 633                 |
| B4galt1   | -2.10                                         |       | 3.20                                              |                                             | 340                 |
| E2ig4     | -2.05                                         |       |                                                   |                                             | absent              |
| Tom111    | -2.00                                         |       |                                                   |                                             | 1275                |
| Ctdsp2    | -1.95                                         |       |                                                   | 1.50                                        | 623                 |
| Nek9      | -1.90                                         |       |                                                   |                                             | 691                 |
| Mapk14    | -1.85                                         |       |                                                   | 1.43                                        | 2061                |
| Vamp3     | -1.60                                         |       | 2.70                                              | 2.30                                        | 1138                |
| Ptpn12    | -1.50                                         |       |                                                   | 1.61                                        | 750                 |

## Supplemental Figure 12

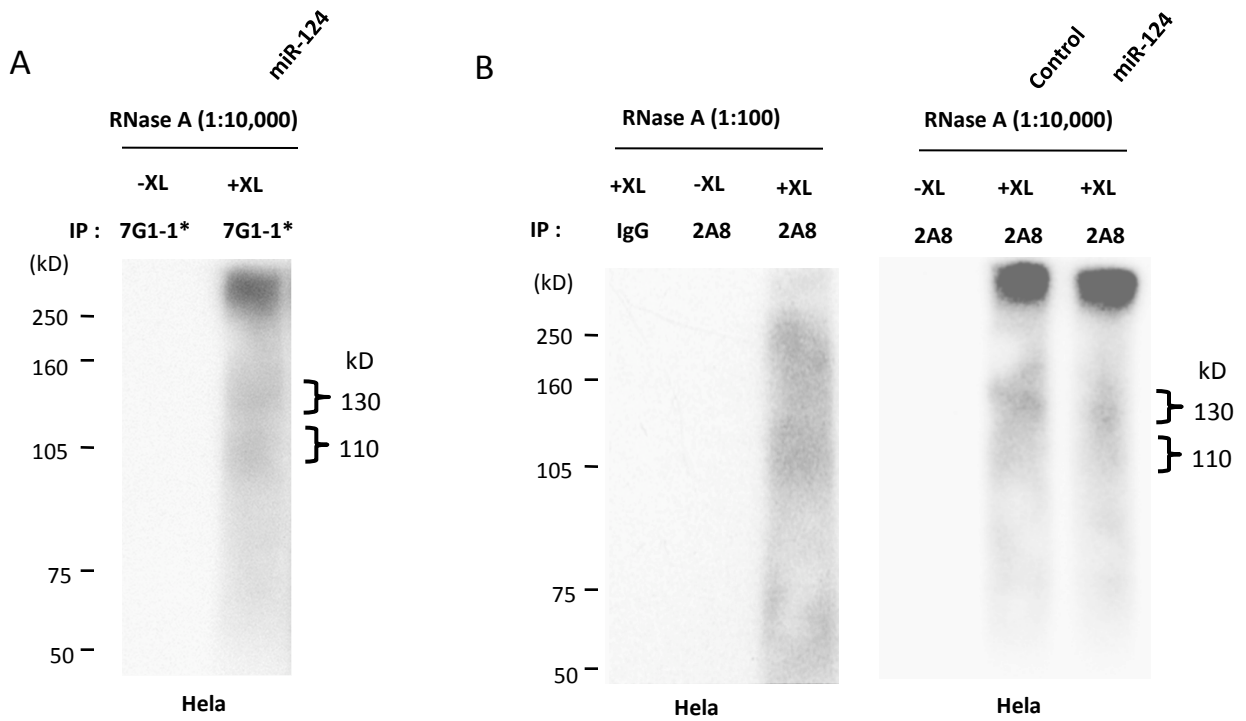

**C**

| Sample | Transfected miRNA | Antibody | Raw tags (prefiltered) | Aligned tags (hg18) | % align | Unique tags |
|--------|-------------------|----------|------------------------|---------------------|---------|-------------|
| HeLa 1 | miR-124           | 2A8      | 11,563,568             | 6,082,765           | 52.6    | 1,271,461   |
| HeLa 2 | miR-124           | 2A8      | 12,681,689             | 5,715,019           | 45.1    | 1,435,945   |
| HeLa 3 | miR-124           | 7G1-1    | 12,484,953             | 5,816,073           | 46.6    | 1,459,849   |
| HeLa 4 | miR-124           | 7G1-1    | 12,441,955             | 5,419,481           | 43.6    | 1,603,967   |
| HeLa 5 | control miRNA     | 2A8      | 10,802,378             | 5,951,833           | 55.1    | 1,184,079   |
| HeLa 6 | control miRNA     | 2A8      | 11,104,169             | 5,813,633           | 52.4    | 1,247,774   |
| HeLa 7 | control miRNA     | 7G1-1    | 12,204,108             | 6,916,662           | 56.7    | 1,272,437   |
| HeLa 8 | control miRNA     | 7G1-1    | 12,957,786             | 3,396,298           | 26.2    | 1,127,326   |



Supplemental Figure 13

Without conservation

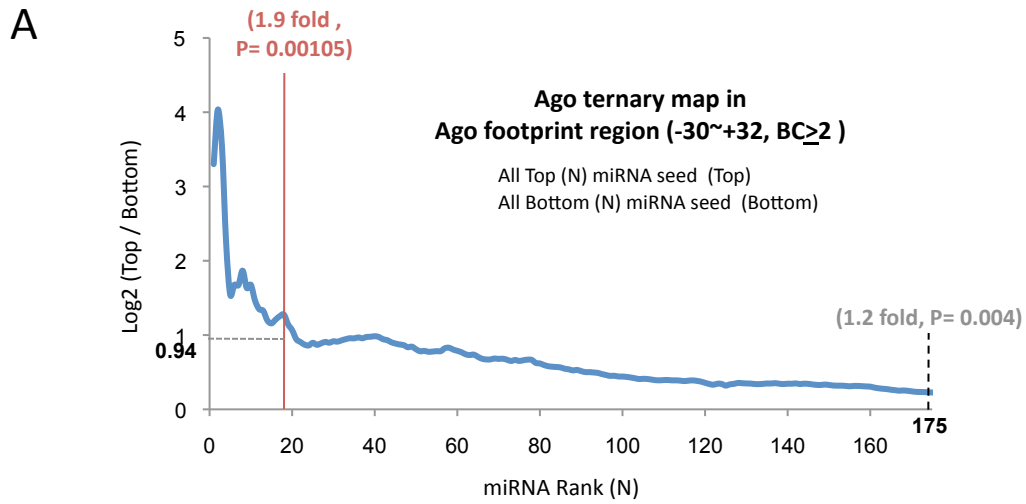

Without conservation

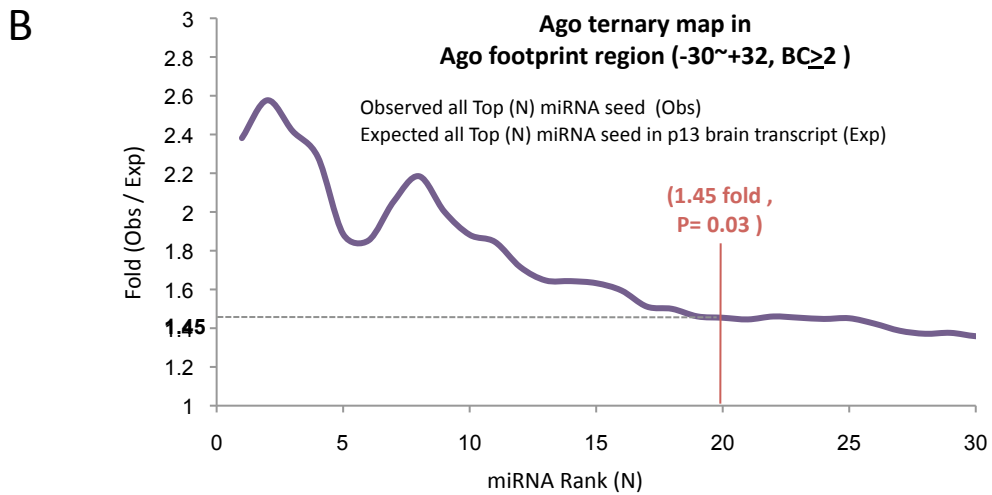

**C With conservation**

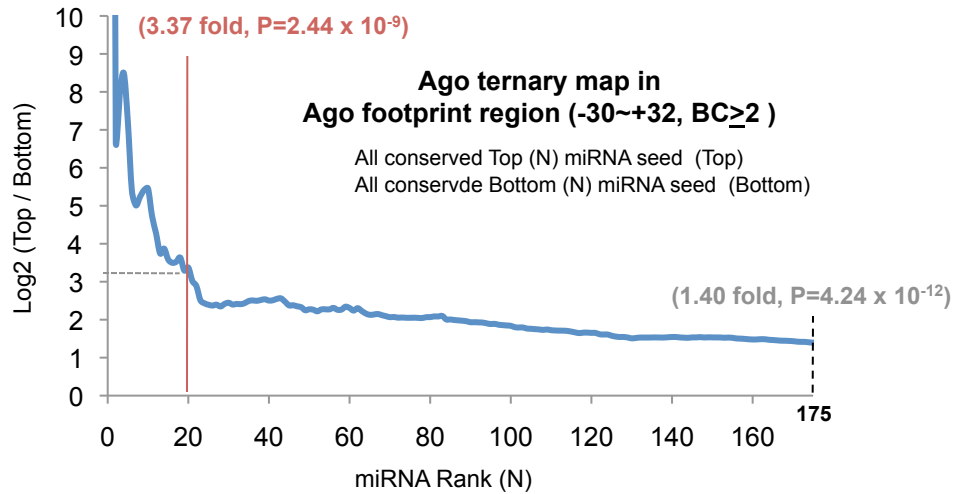

**D With conservation**

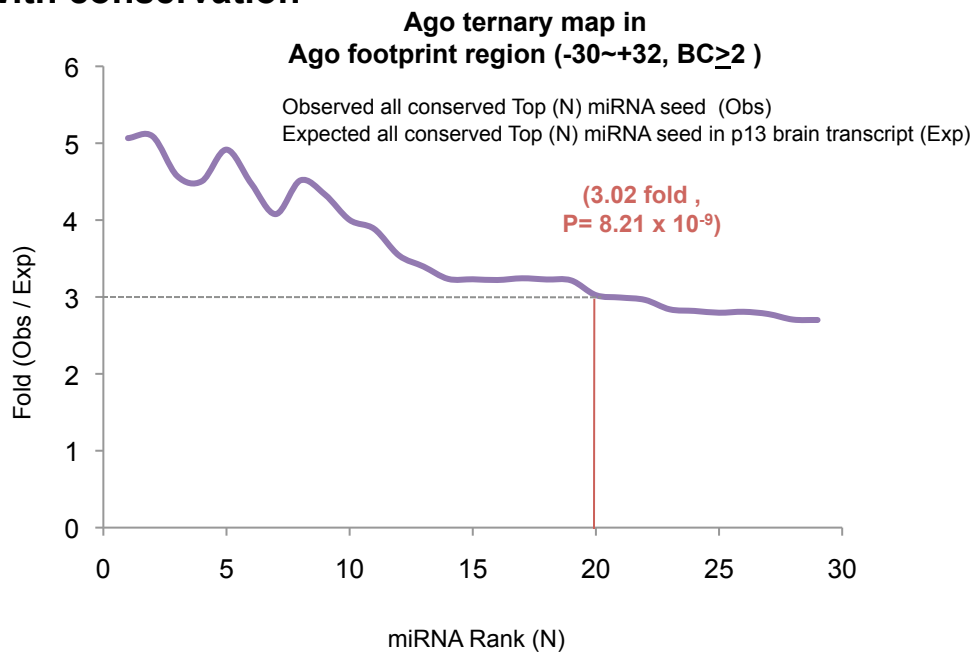

**Π**

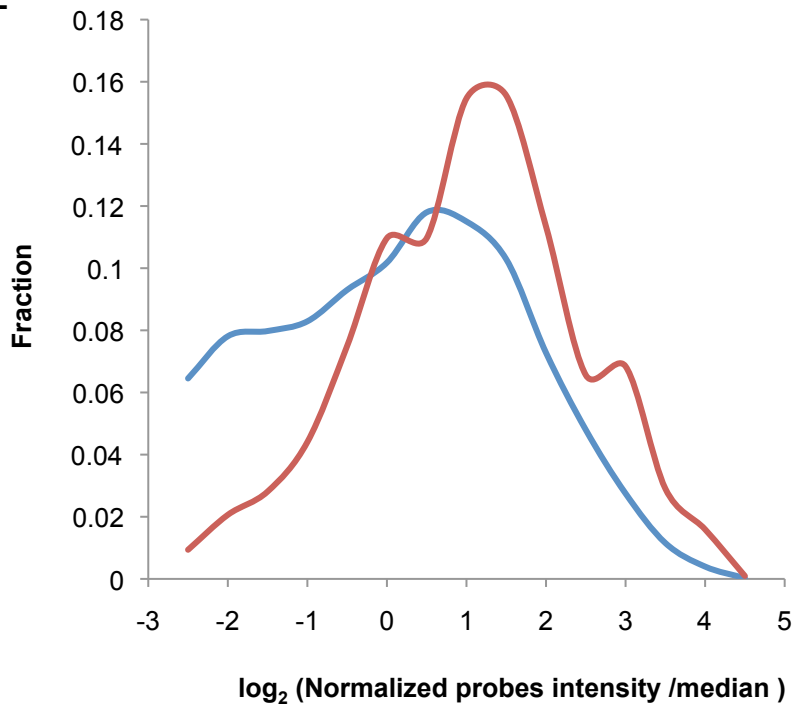

Supplemental Figure 14

A

| BC>=2                                |                  |
|--------------------------------------|------------------|
| Number of Ago-mRNA clusters in 3'UTR | Number of 3'UTRs |
| 1                                    | 1665             |
| 2                                    | 584              |
| 3                                    | 262              |
| 4                                    | 130              |
| 5                                    | 87               |
| 6                                    | 49               |
| 7                                    | 34               |
| 8                                    | 27               |
| 9                                    | 17               |
| 10                                   | 9                |
| >10                                  | 43               |

Averages:

1.03 clusters/transcript in brain

2.60 clusters/Ago regulated transcript

2.12 clusters /3'UTR of Ago regulated transcript

B

| miRNA family | Number of target transcripts |
|--------------|------------------------------|
| miR-124      | 1254                         |
| miR-9        | 1207                         |
| miR-27       | 1080                         |
| let-7        | 1060                         |
| miR-15       | 787                          |
| miR-181      | 740                          |
| miR-101      | 631                          |
| miR-34       | 626                          |
| miR-30       | 610                          |
| miR-26       | 602                          |
| miR-138      | 573                          |
| miR-17       | 536                          |
| miR-125      | 517                          |
| miR-708      | 498                          |
| miR-19       | 486                          |
| miR-153      | 455                          |
| miR-193      | 448                          |
| miR-21       | 358                          |
| miR-344      | 320                          |
| miR-221      | 315                          |

Average 655 targets / miRNA

C

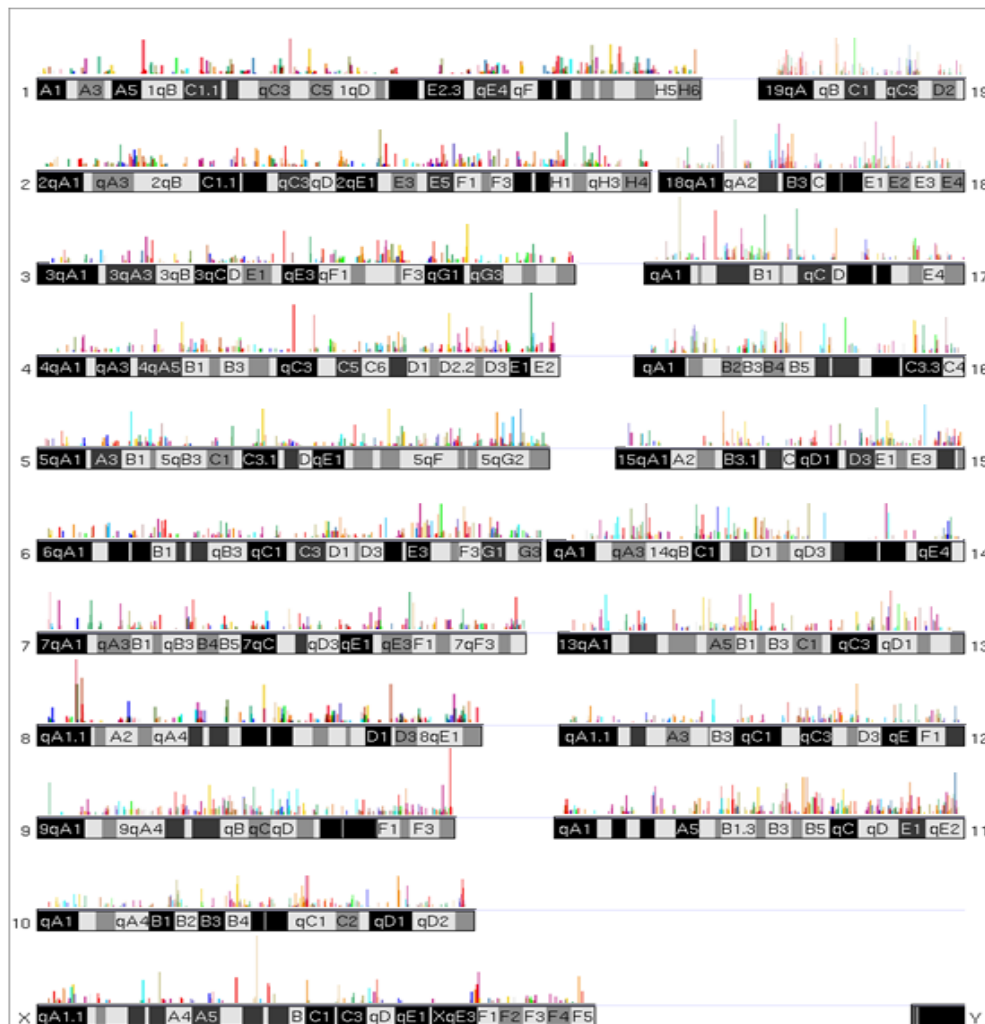

Supplemental Figure 15

A

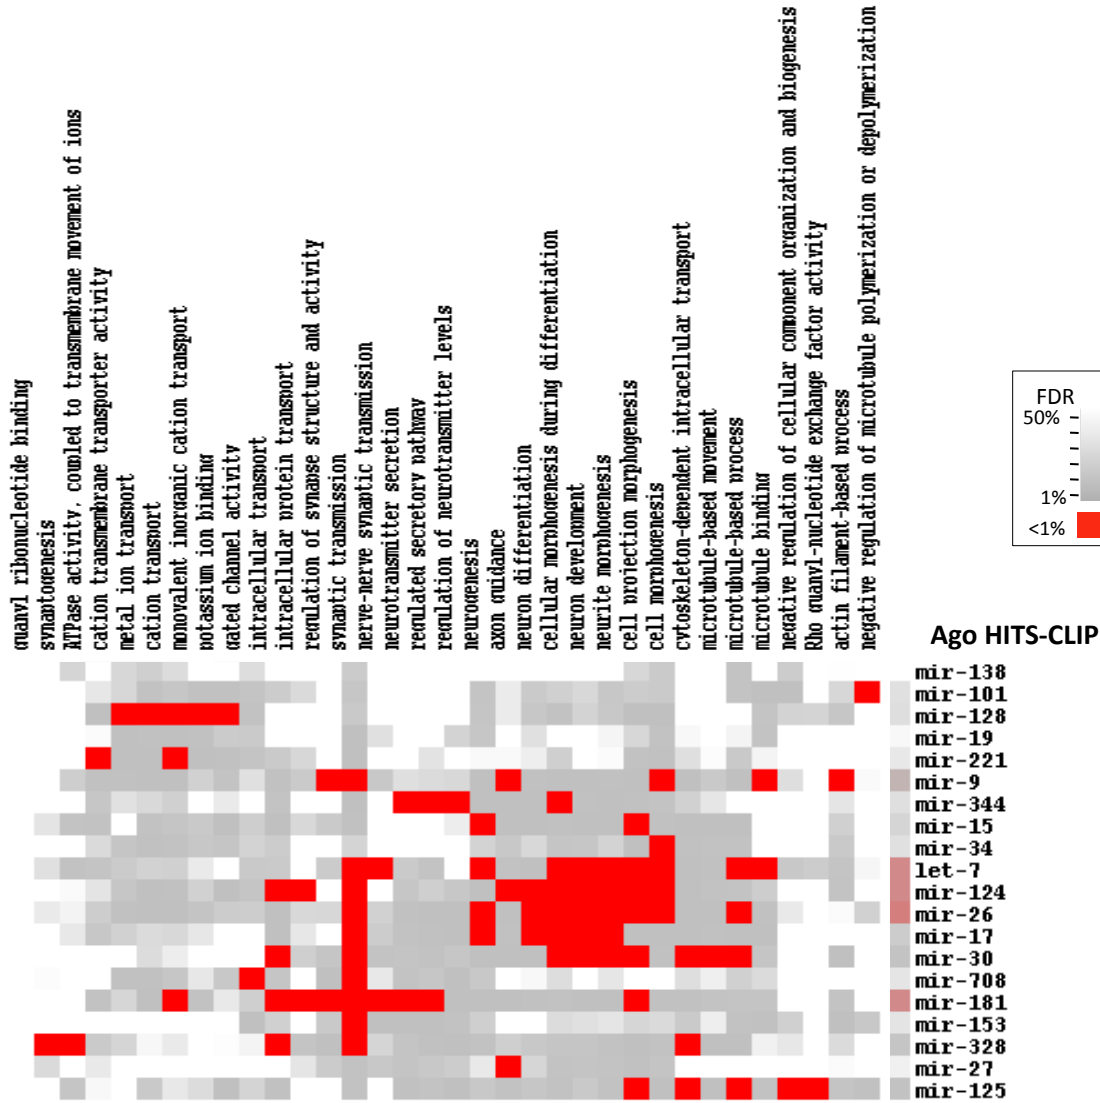

B

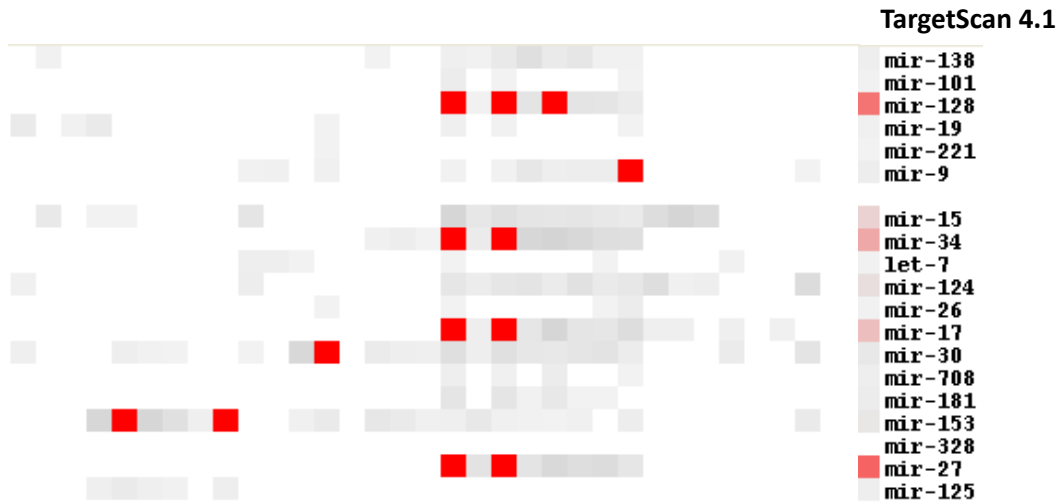

C

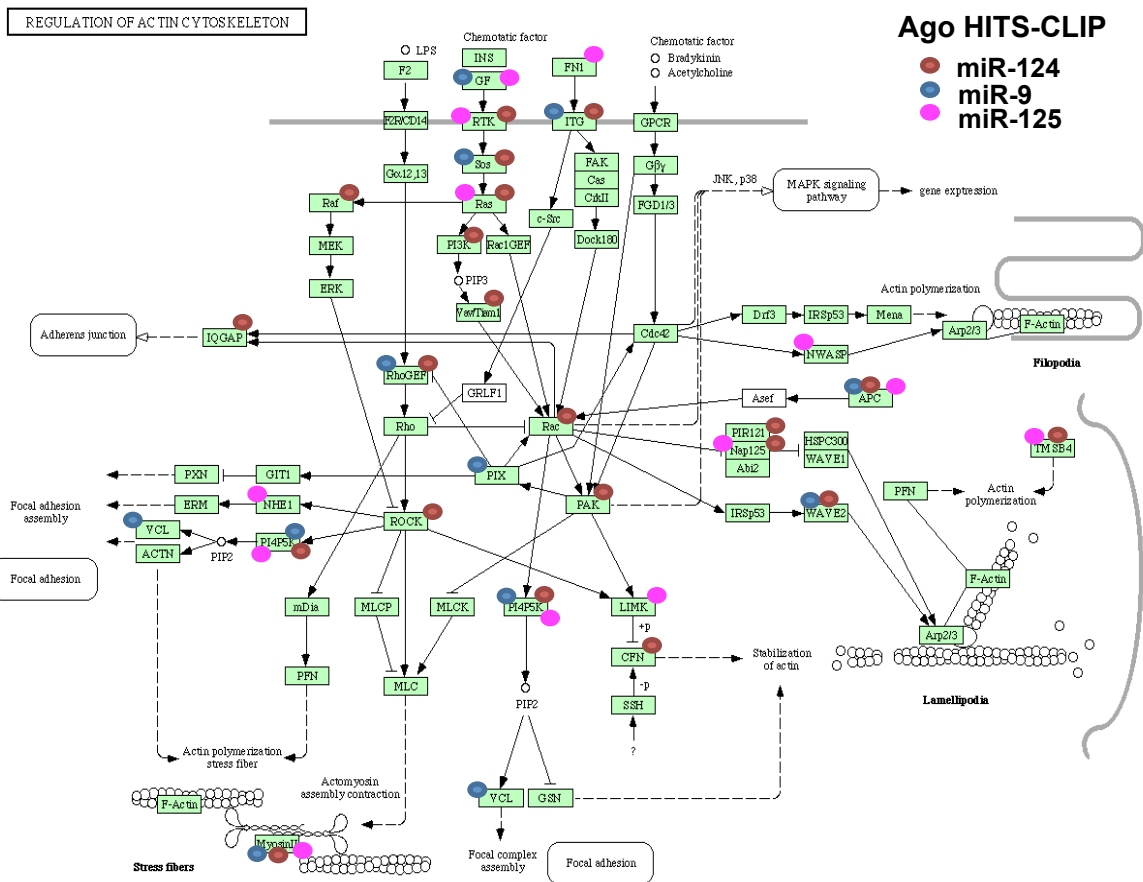

D

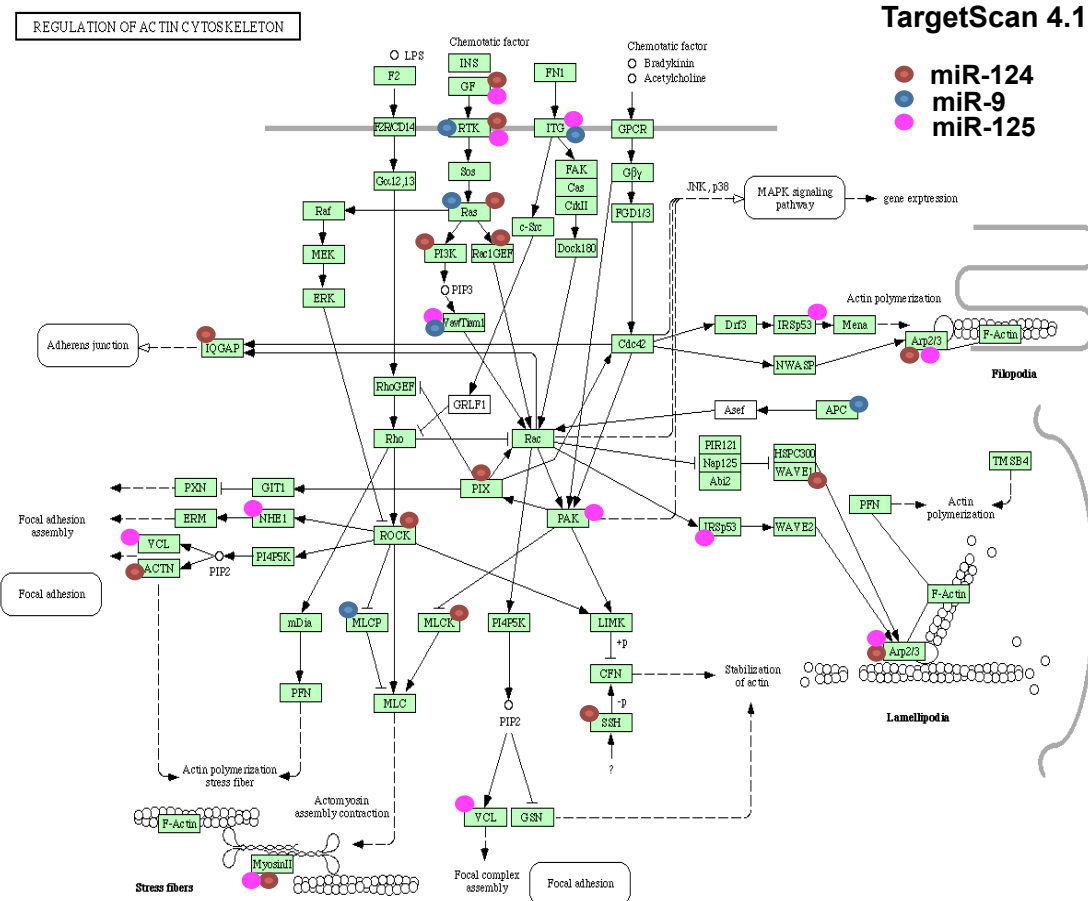

Supplemental Figure 16

A

|                                         | Number of Ago mir-124 clusters | Number of Ago Top20 miRNA clusters |
|-----------------------------------------|--------------------------------|------------------------------------|
| Ago-CLIP                                | 1561                           | 15665                              |
| Average # of clusters in 10 simulations | 1487                           | 14410.7                            |
| Standard deviation                      | 2.05                           | 16.57                              |
| simulation #1                           | 1484                           | 14401                              |
| simulation #2                           | 1490                           | 14417                              |
| simulation #3                           | 1489                           | 14401                              |
| simulation #4                           | 1488                           | 14440                              |
| simulation #5                           | 1484                           | 14413                              |
| simulation #6                           | 1487                           | 14408                              |
| simulation #7                           | 1487                           | 14388                              |
| simulation #8                           | 1488                           | 14412                              |
| simulation #9                           | 1488                           | 14393                              |
| simulation #10                          | 1485                           | 14434                              |
| recovery rate(%)                        | 95                             | 92                                 |

B

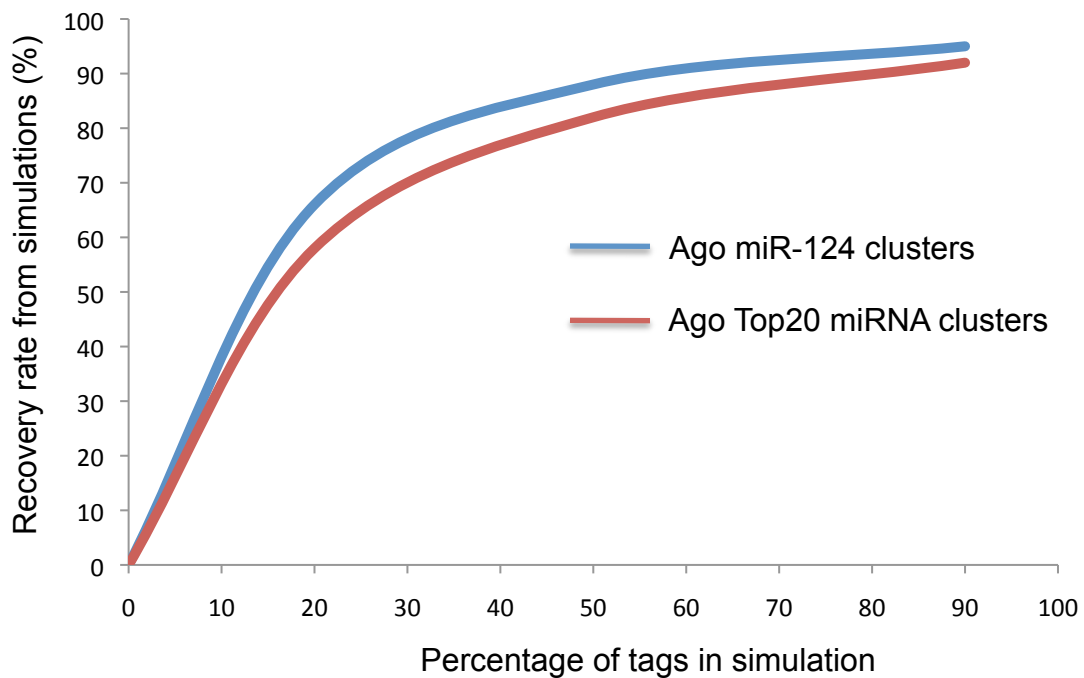

Supplement: NIHMS120632-supplement-supp_data_set.pdf [file NIHMS120632-supplement-supp_data_set.pdf]
